# Supplementary material
Source: Royal Society of Chemistry journal article supplement (doi:10.1039/d6py00183a)
Supplement: d6py00183a1.pdf [file d6py00183a1.pdf]

## Supporting Information

# Palladium-Catalyzed Direct Preparation of Highly Branched Ethylene Oligomers and MA Functionalized Derivatives Using Dibenzhydryl Pyrazine-Imine Ligands

Yusheng Han <sup>a,b</sup>, Hui Wang <sup>a\*</sup>, Shengyu Dai <sup>b\*</sup>

<sup>a</sup>*Department of Chemical and Pharmaceutical Engineering, Hefei Normal University, Hefei 230601, China.*

<sup>b</sup>*School of Chemistry and Materials Science, Anhui Normal University, Wuhu 241002, China.*

\*To whom correspondence should be addressed. [whui@hfnu.edu.cn](mailto:whui@hfnu.edu.cn) (H., Wang); [daiyu@ahnu.edu.cn](mailto:daiyu@ahnu.edu.cn) (Shengyu Dai).

### 1. Experimental sections

#### 1.1 General Considerations

All chemicals were commercially sourced, except those whose synthesis is described. All experiments were carried out under a dry nitrogen atmosphere using standard Schlenk techniques or in a glove-box. Deuterated solvents used for NMR were dried and distilled prior to use. <sup>1</sup>H, <sup>13</sup>C and 2D NMR spectra were recorded by an AVANCE NEO 400M or 500M spectrometer at ambient temperature unless otherwise stated. The chemical shifts of the <sup>1</sup>H and <sup>13</sup>C NMR spectra were referenced to the residual solvent; coupling constants are in Hz. Molecular weight of the (MF)HBEOs was determined by <sup>1</sup>H and <sup>13</sup>C NMR spectra. Elemental analysis was performed by the Analytical Center of Anhui Normal University. The ligands **L1-L4** were prepared using methods reported by our research group and are all known compounds<sup>1</sup>.

### 2. Spectra Data

#### 2.1 <sup>1</sup>H, <sup>13</sup>C and 2D NMR of the Synthetic Compounds

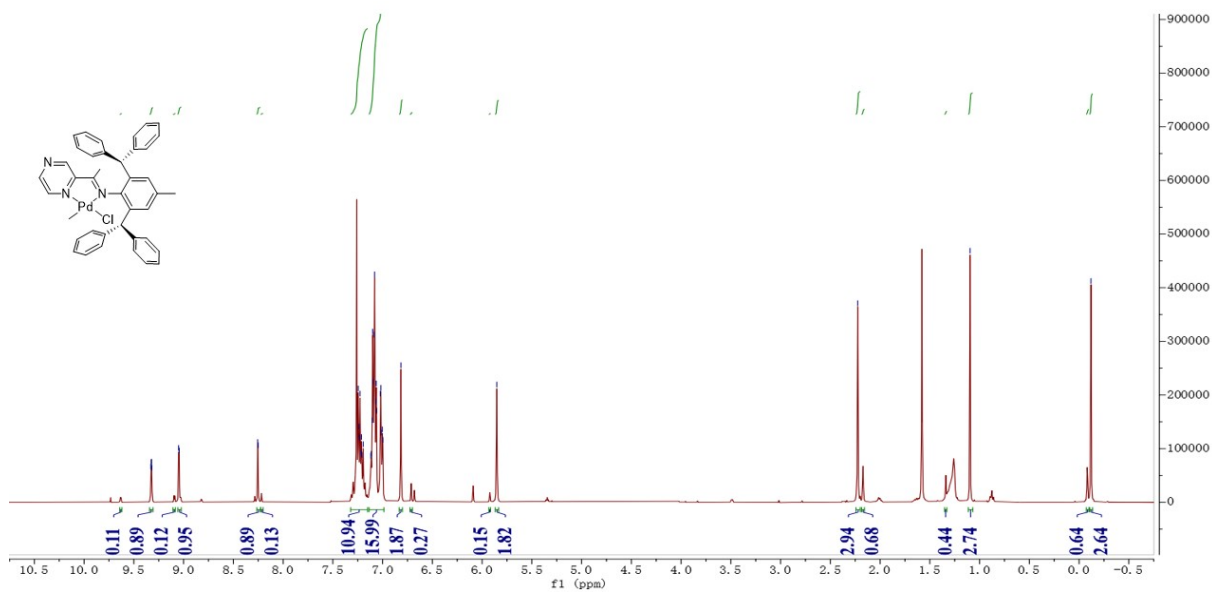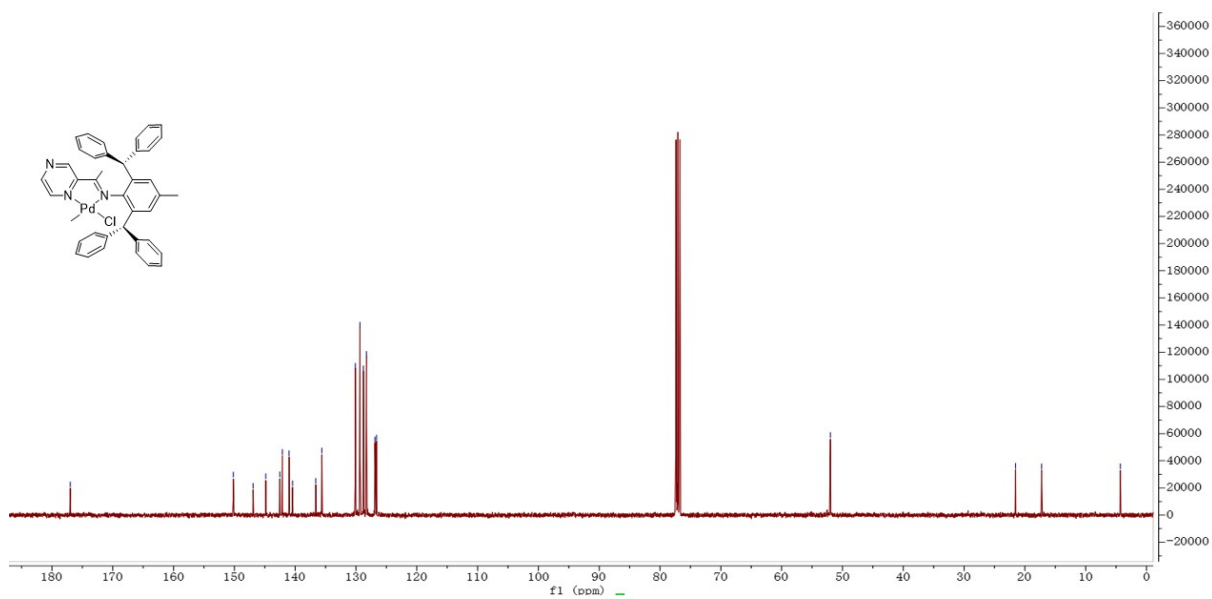

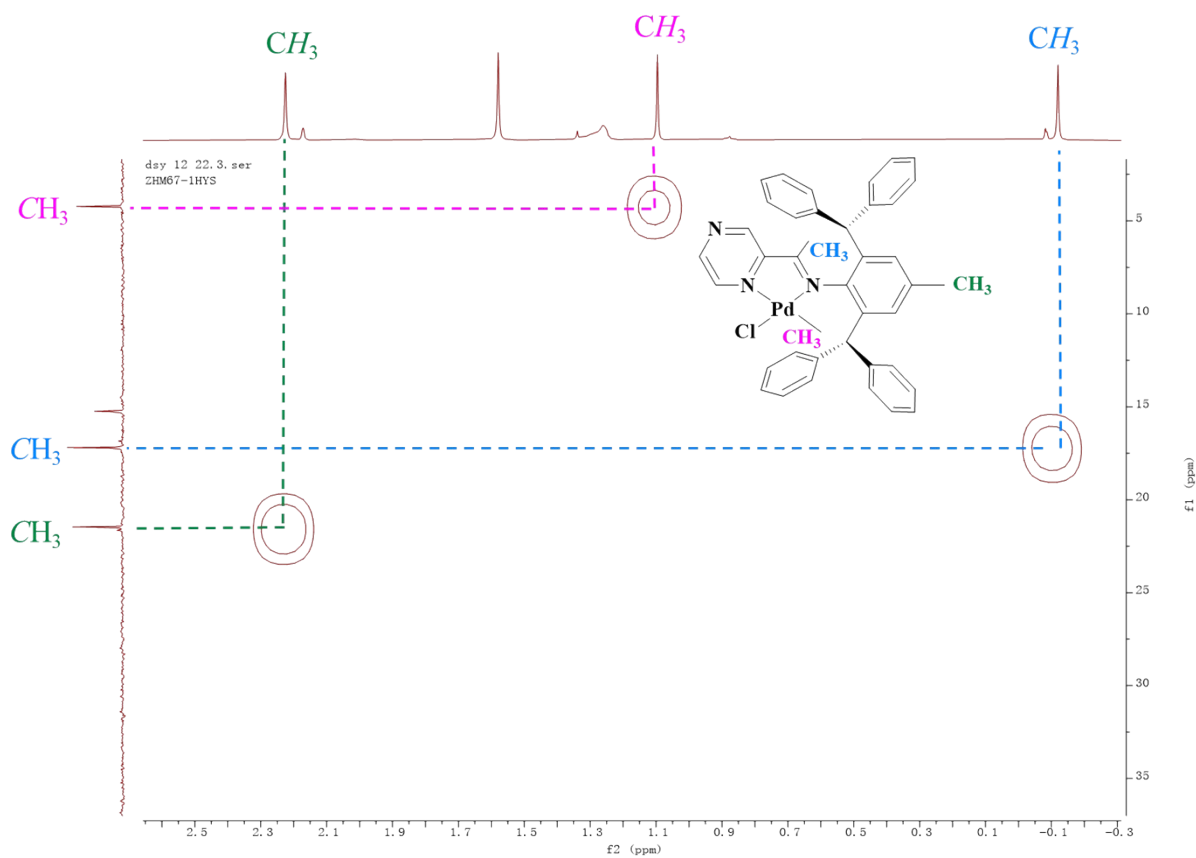

**Figure S3.**  $^1\text{H}$ - $^{13}\text{C}$  HSQC NMR spectrum of **Pd1** in  $\text{CDCl}_3$  (500 MHz, 20  $^\circ\text{C}$ ).

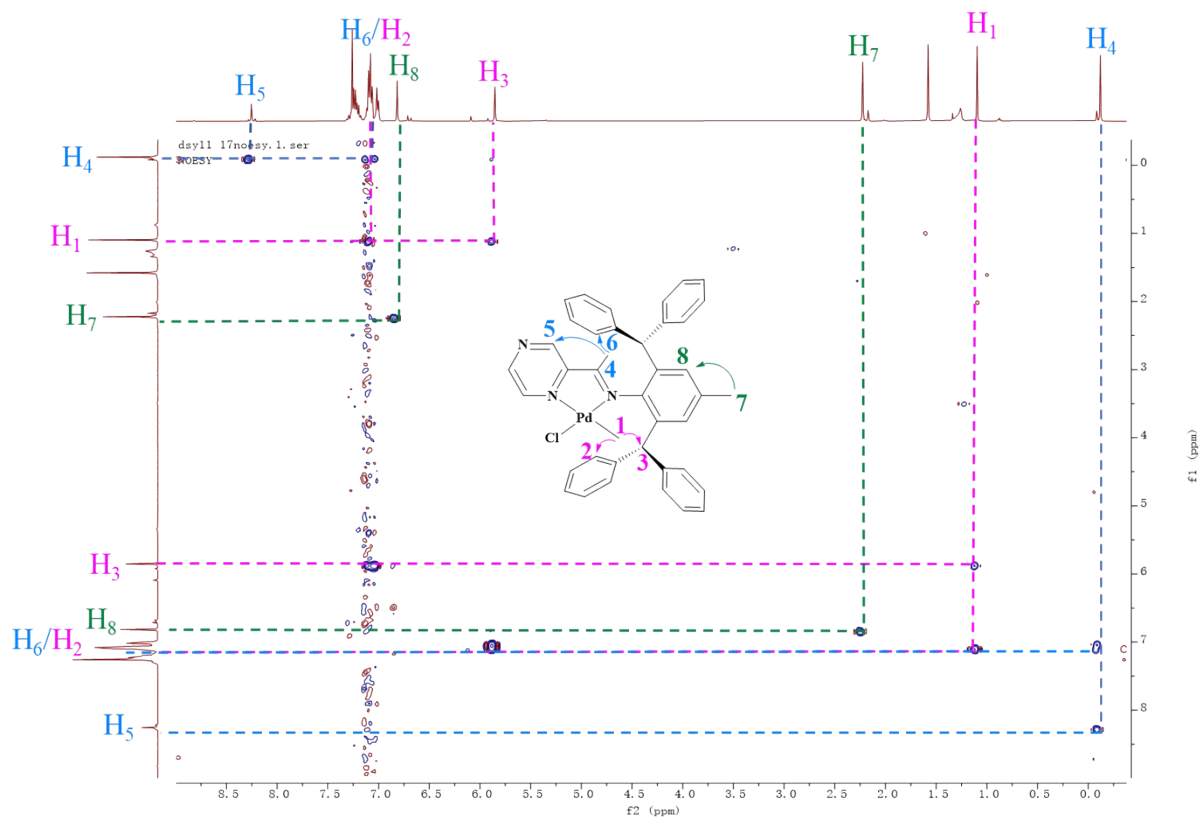

**Figure S4.**  $^1\text{H}$ - $^1\text{H}$  NOESY NMR spectrum of **Pd1** in  $\text{CDCl}_3$  (500 MHz, 20  $^\circ\text{C}$ ).

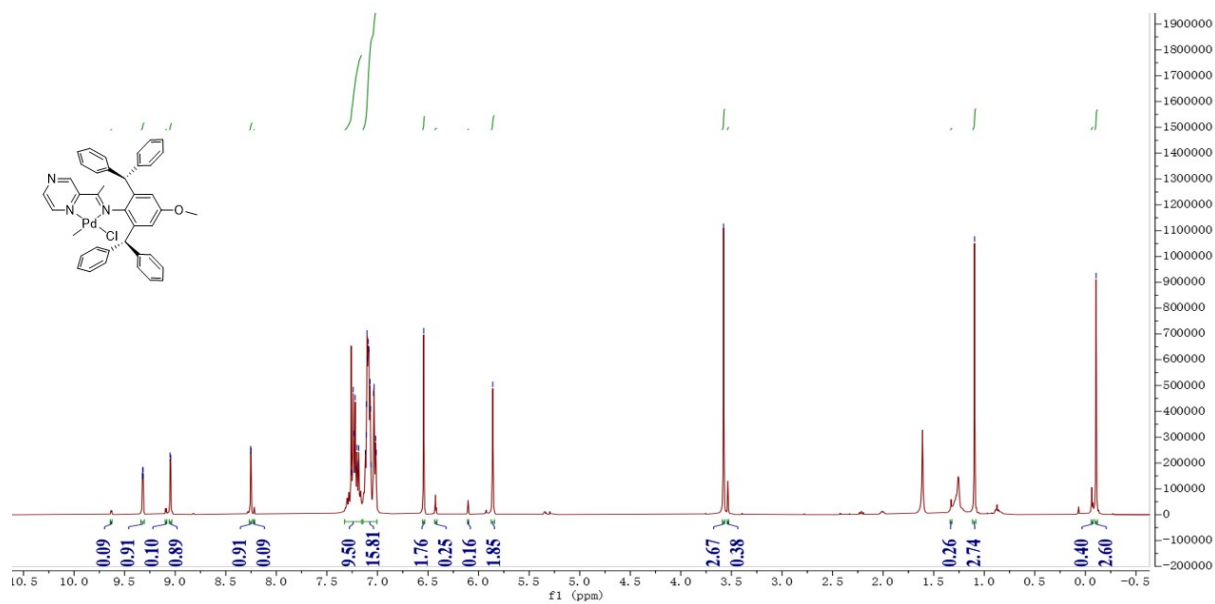

**Figure S5.**  $^1\text{H}$  NMR spectrum of Pd2 in  $\text{CDCl}_3$  (400 MHz, 20 °C).

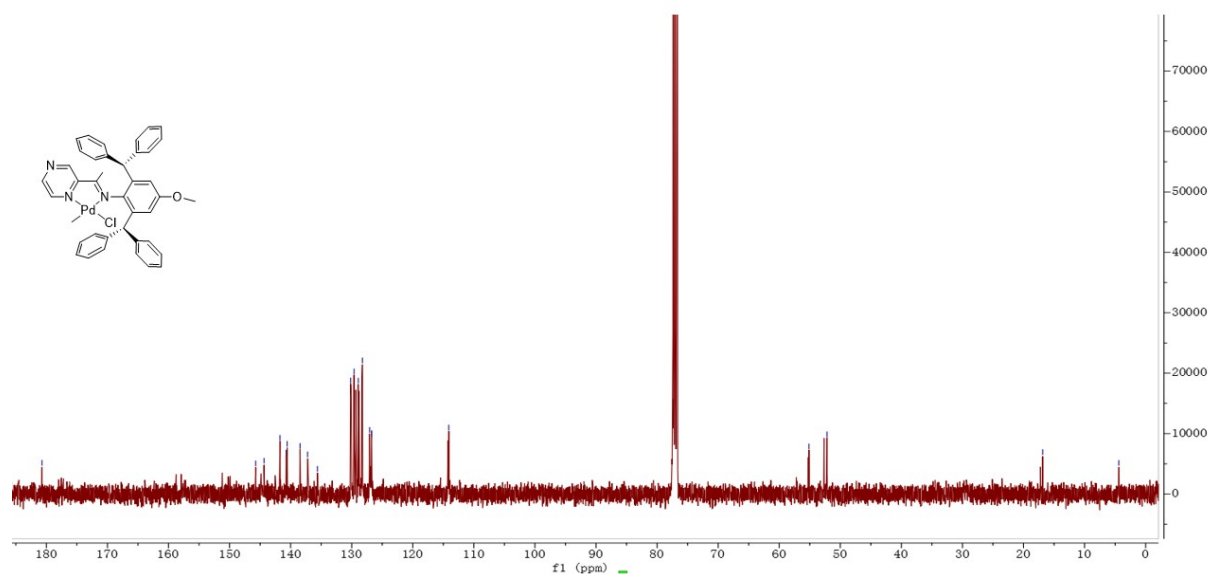

**Figure S6.**  $^{13}\text{C}$  NMR spectrum of Pd2 in  $\text{CDCl}_3$  (400 MHz, 20 °C).

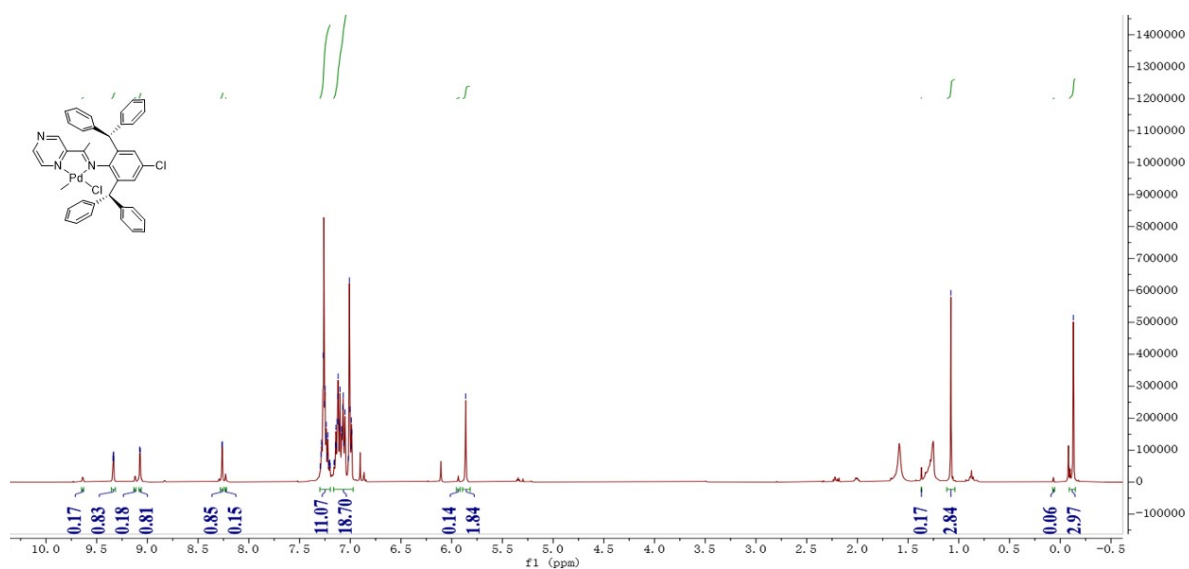

**Figure S7.**  $^1\text{H}$  NMR spectrum of **Pd3** in  $\text{CDCl}_3$  (400 MHz, 20 °C).

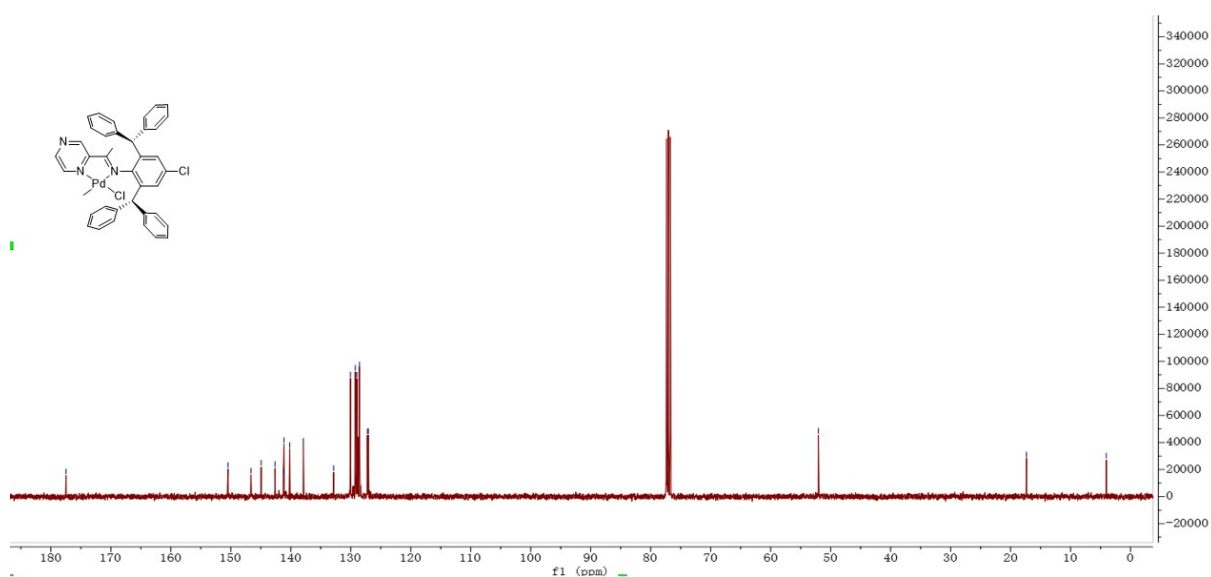

**Figure S8.**  $^{13}\text{C}$  NMR spectrum of **Pd3** in  $\text{CDCl}_3$  (400 MHz, 20 °C).

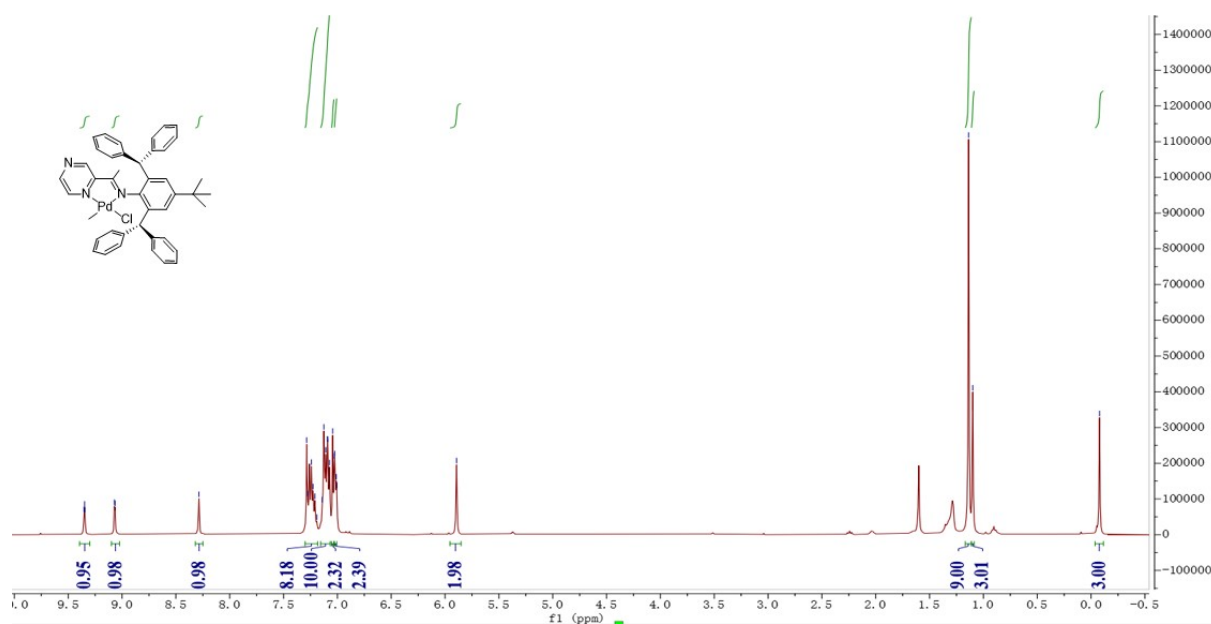

**Figure S9.** <sup>1</sup>H NMR spectrum of Pd4 in CDCl<sub>3</sub> (400 MHz, 20 °C).

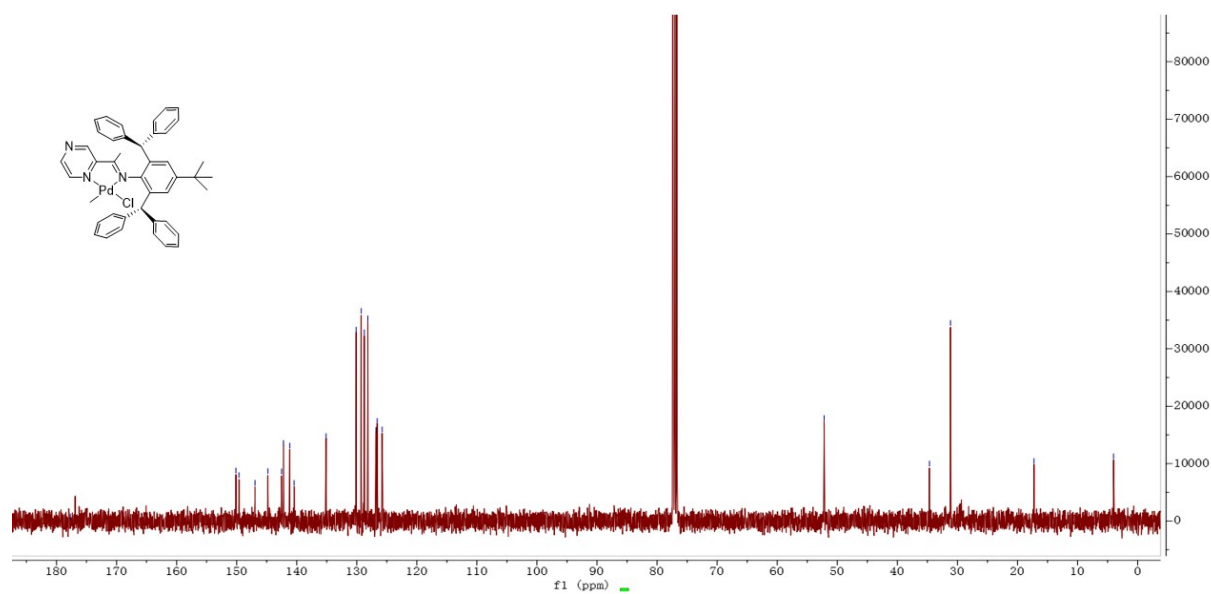

**Figure S10.** <sup>13</sup>C NMR spectrum of Pd4 in CDCl<sub>3</sub> (400 MHz, 20 °C).

## 2.2 <sup>1</sup>H NMR of Representative HBEOs and MFHBEOs.

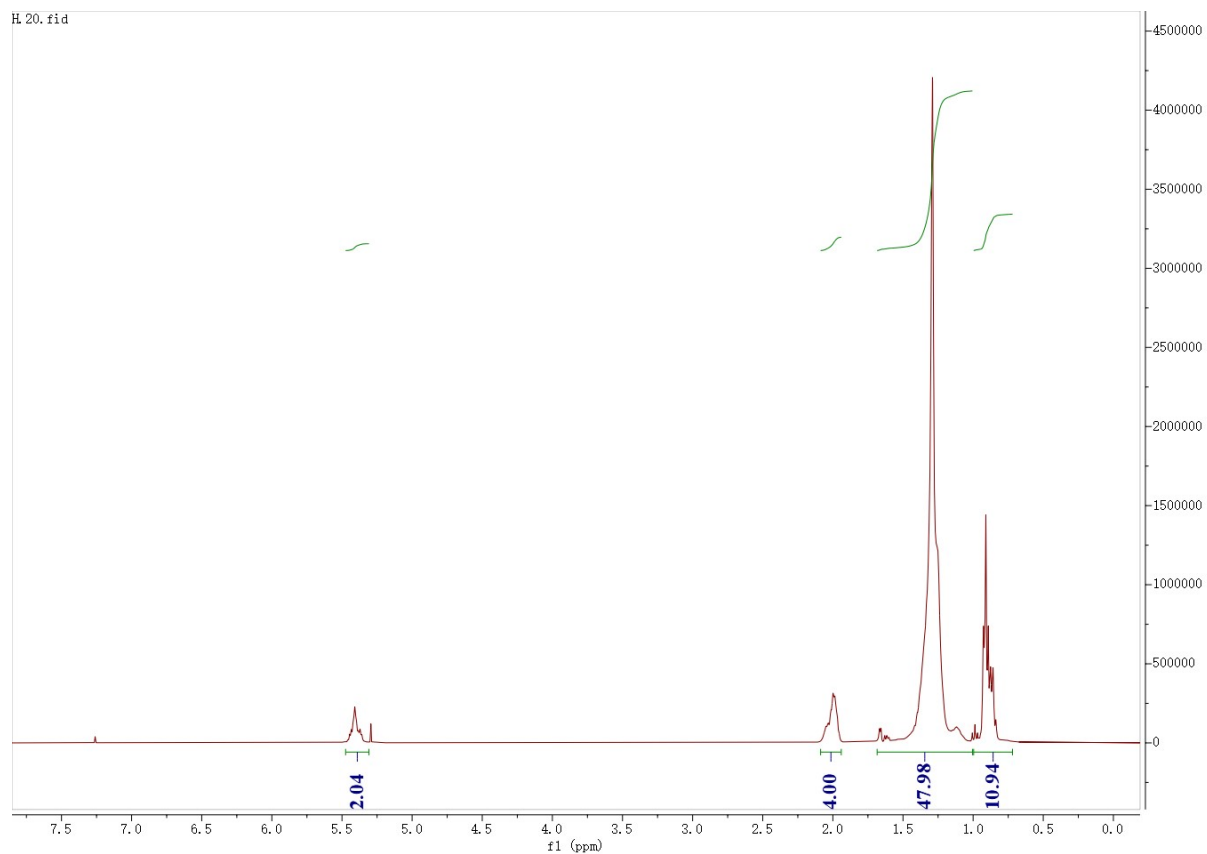

**Figure S11.**  $^1\text{H}$  NMR spectrum of the HBEO from entry 1, table 1 ( $\text{CDCl}_3$ ,  $20^\circ\text{C}$ ).

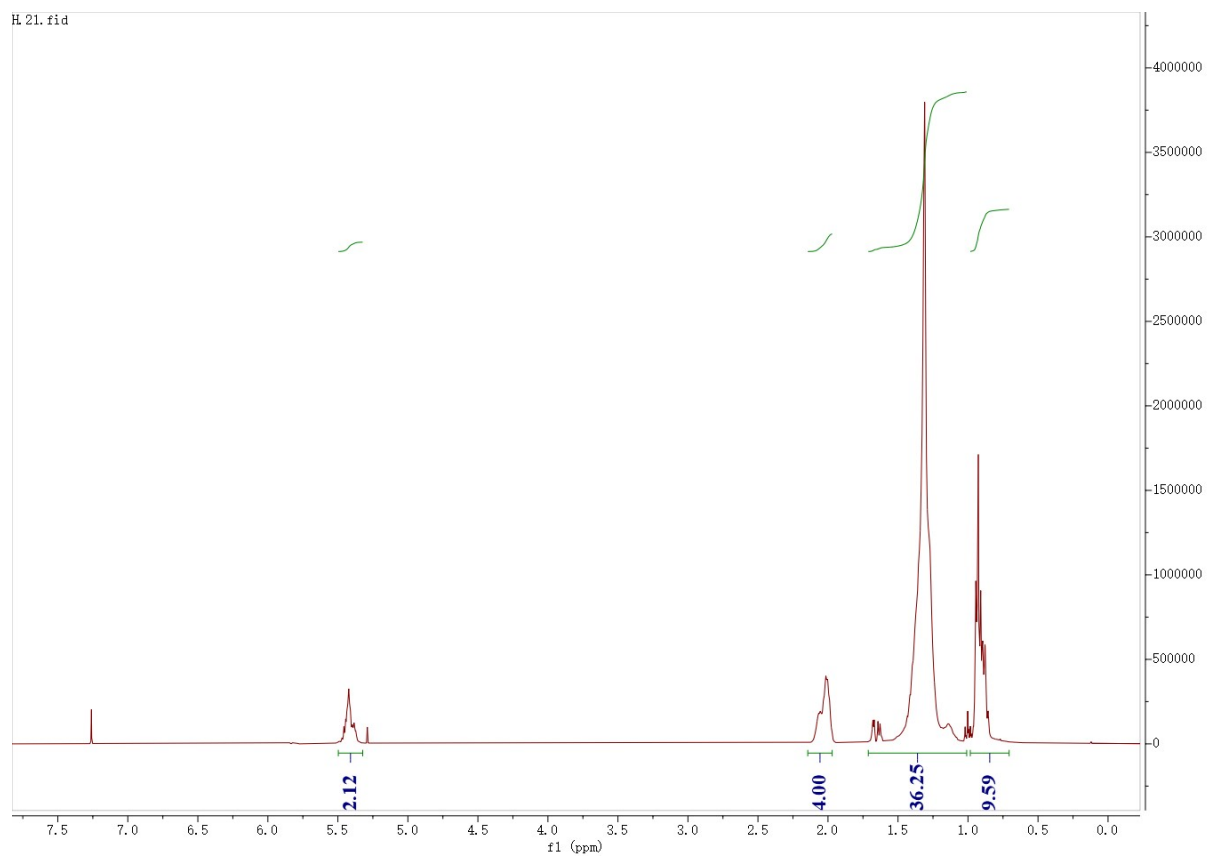

**Figure S12.**  $^1\text{H}$  NMR spectrum of the HBEO from entry 2, table 1 ( $\text{CDCl}_3$ ,  $20^\circ\text{C}$ ).

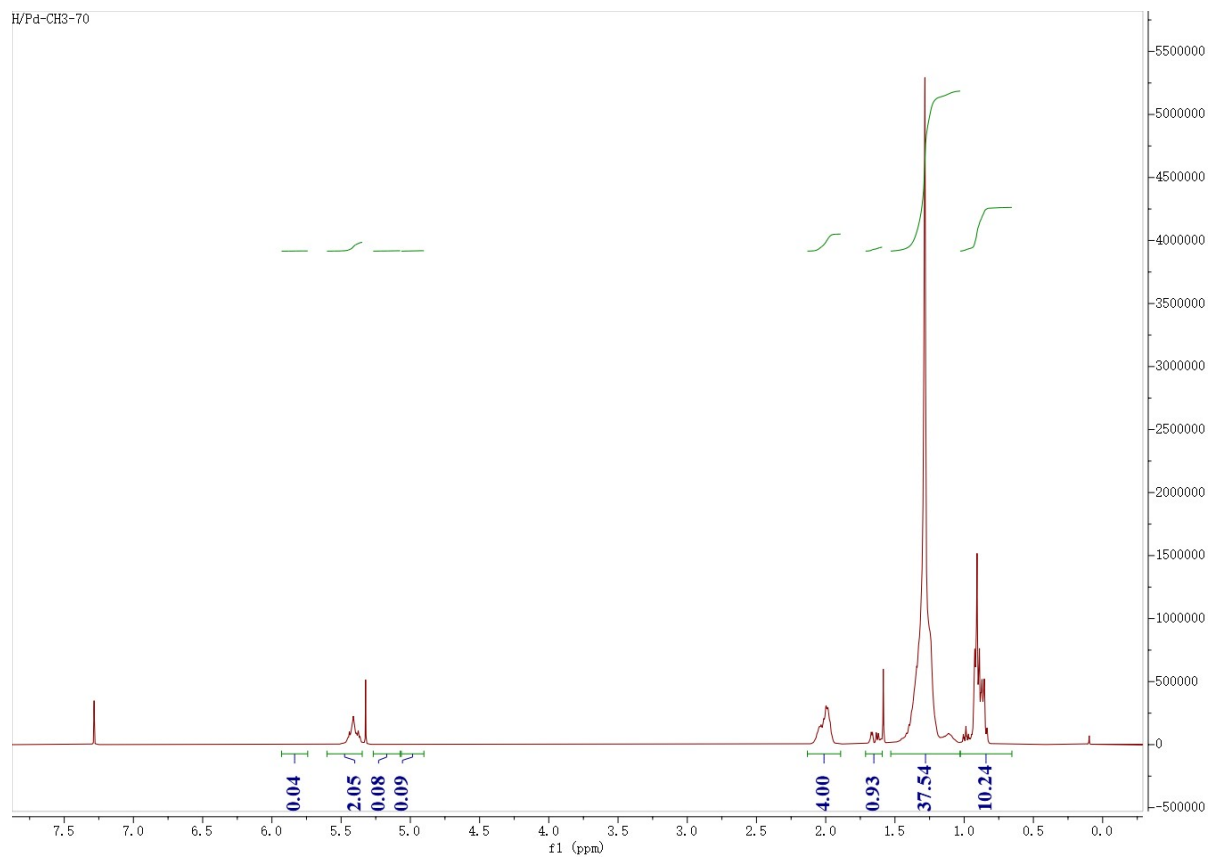

**Figure S13.**  $^1\text{H}$  NMR spectrum of the HBE0 from entry 3, table 1 ( $\text{CDCl}_3$ ,  $20^\circ\text{C}$ ).

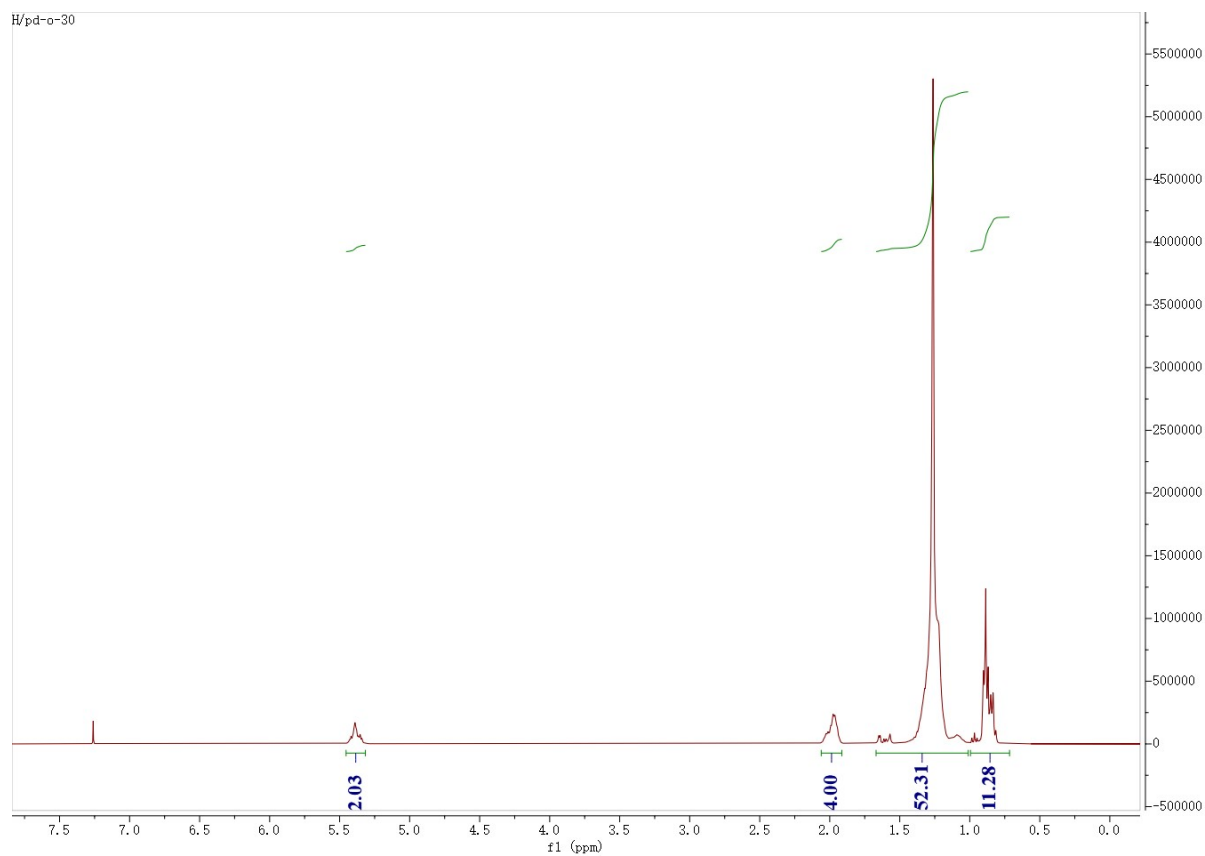

**Figure S14.**  $^1\text{H}$  NMR spectrum of the HBE0 from entry 4, table 1 ( $\text{CDCl}_3$ ,  $20^\circ\text{C}$ ).

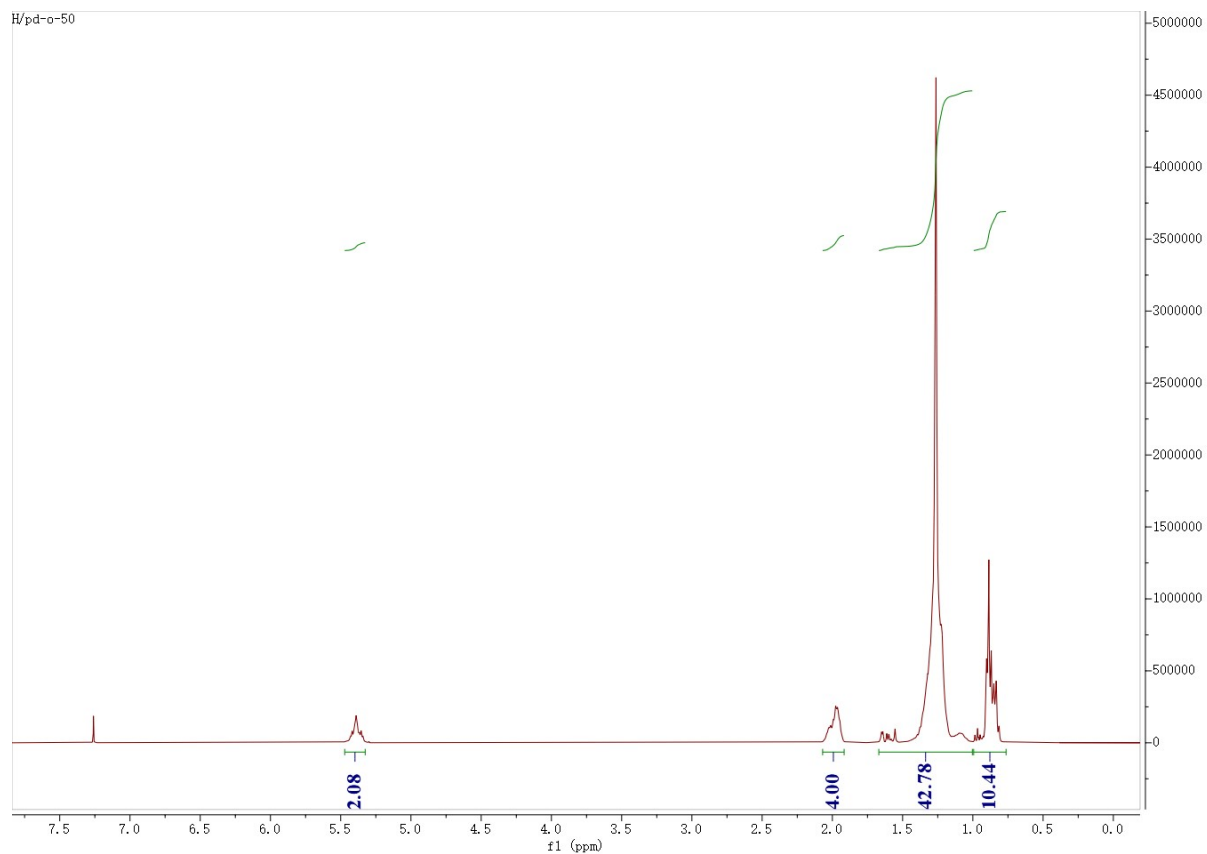

**Figure S15.**  $^1\text{H}$  NMR spectrum of the HBE0 from entry 5, table 1 ( $\text{CDCl}_3$ ,  $20^\circ\text{C}$ ).

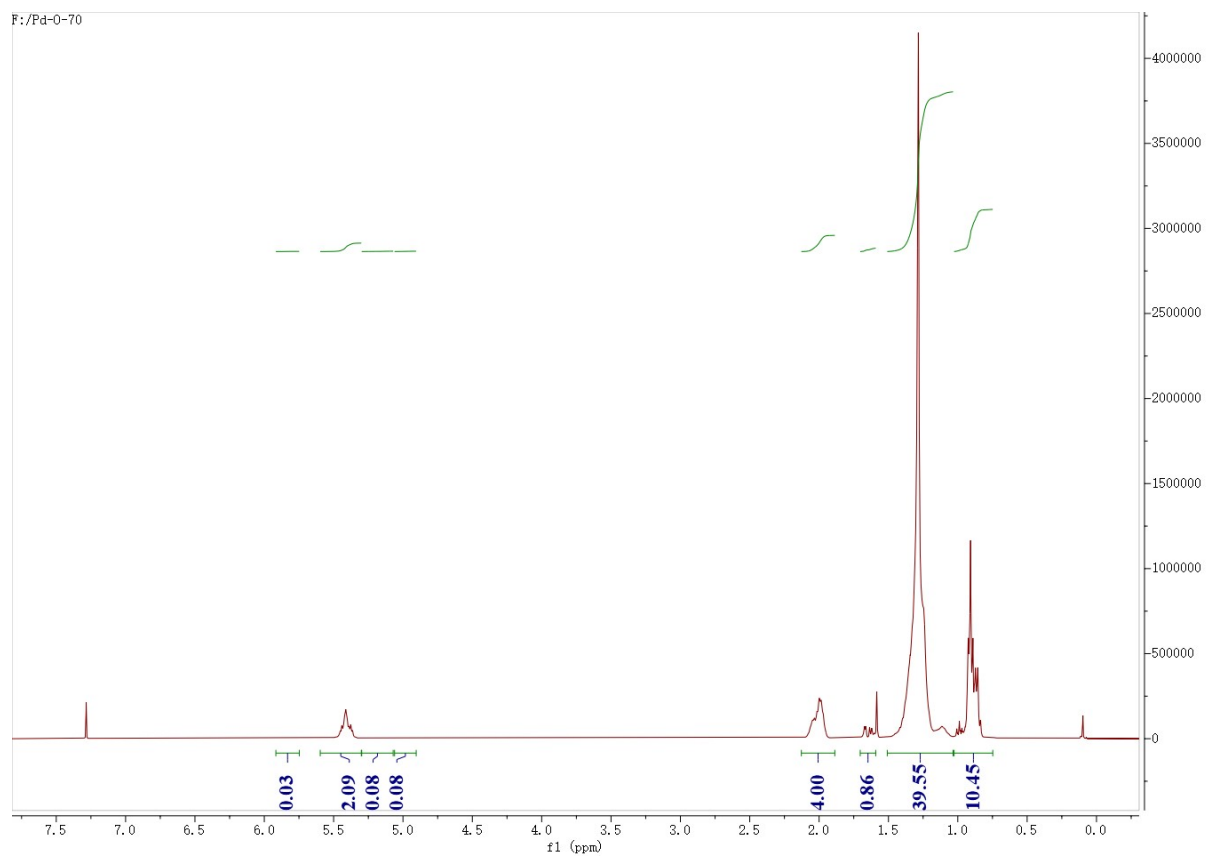

**Figure S16.**  $^1\text{H}$  NMR spectrum of the HBE0 from entry 6, table 1 ( $\text{CDCl}_3$ ,  $20^\circ\text{C}$ ).

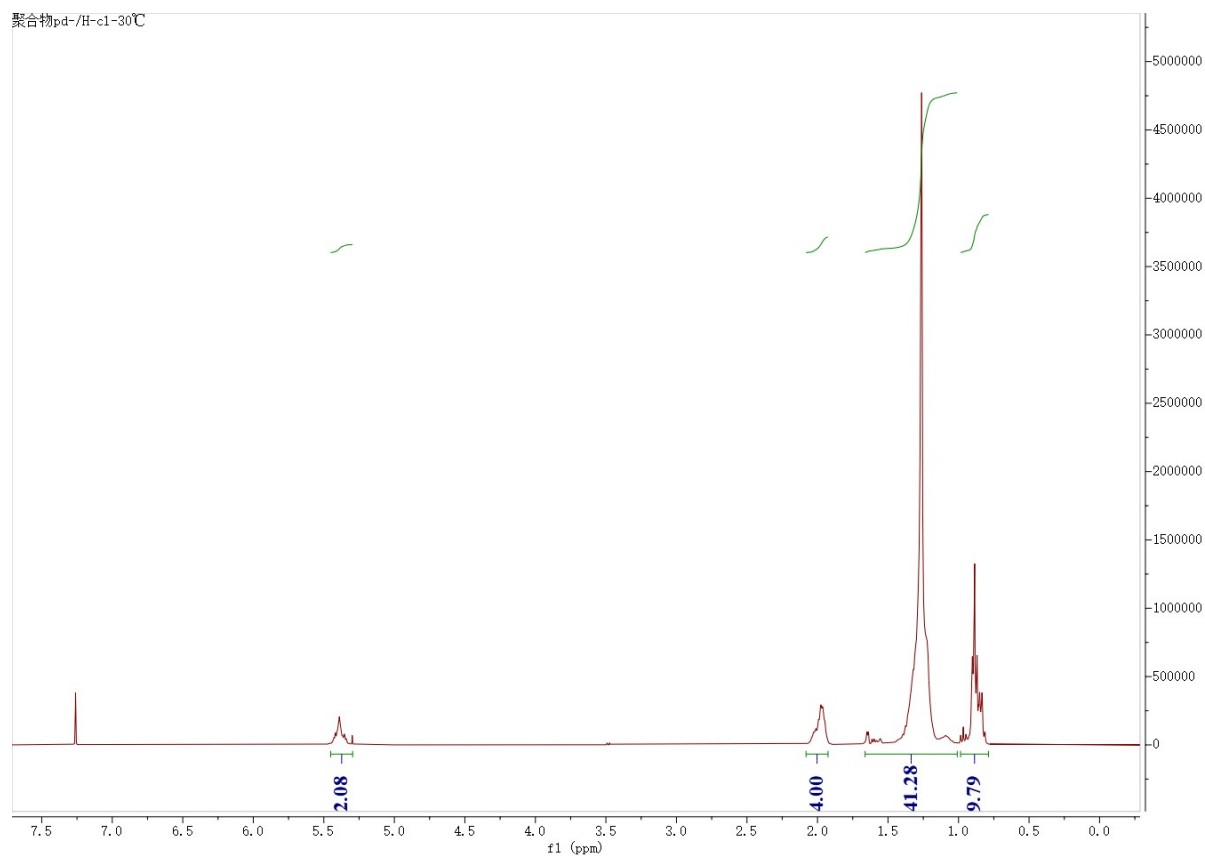

**Figure S17.**  $^1\text{H}$  NMR spectrum of the HBEO from entry 7, table 1 ( $\text{CDCl}_3$ , 20 °C).

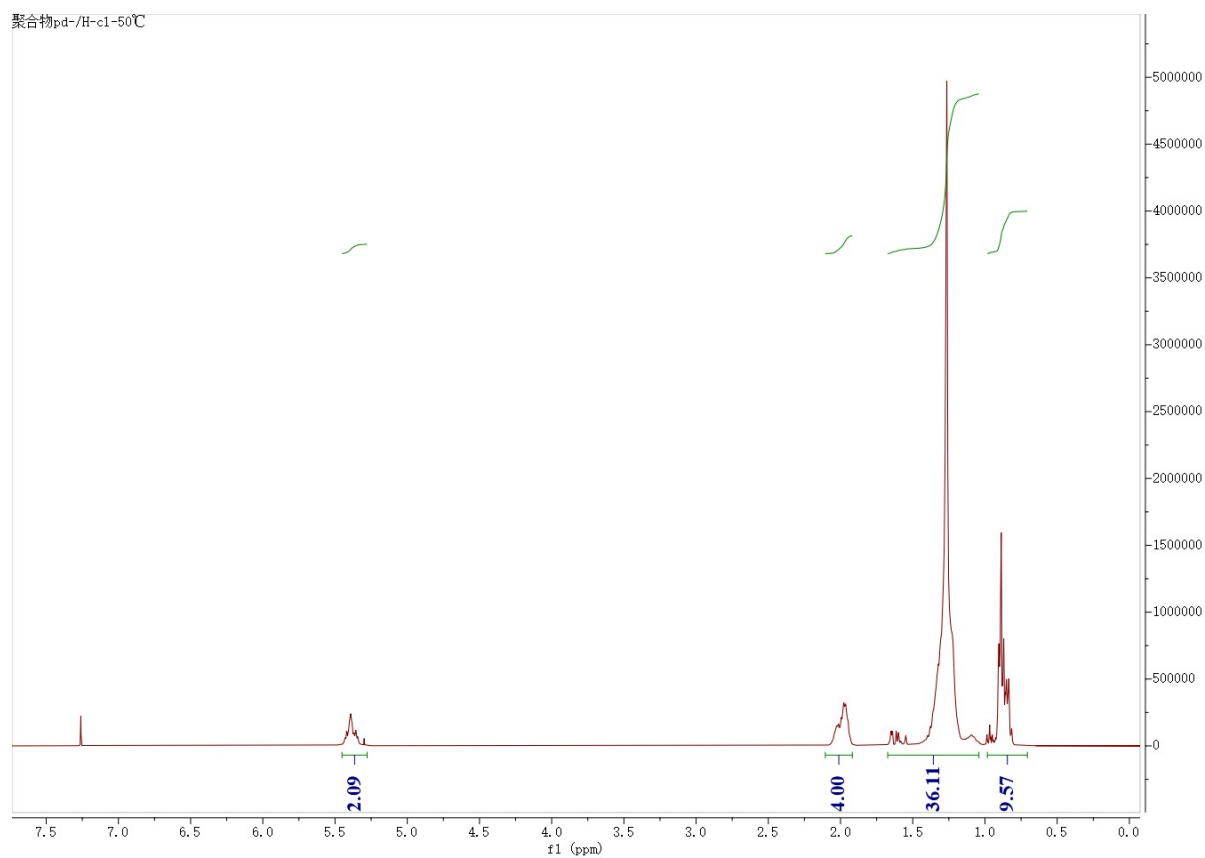

**Figure S18.**  $^1\text{H}$  NMR spectrum of the HBEO from entry 8, table 1 ( $\text{CDCl}_3$ , 20 °C).

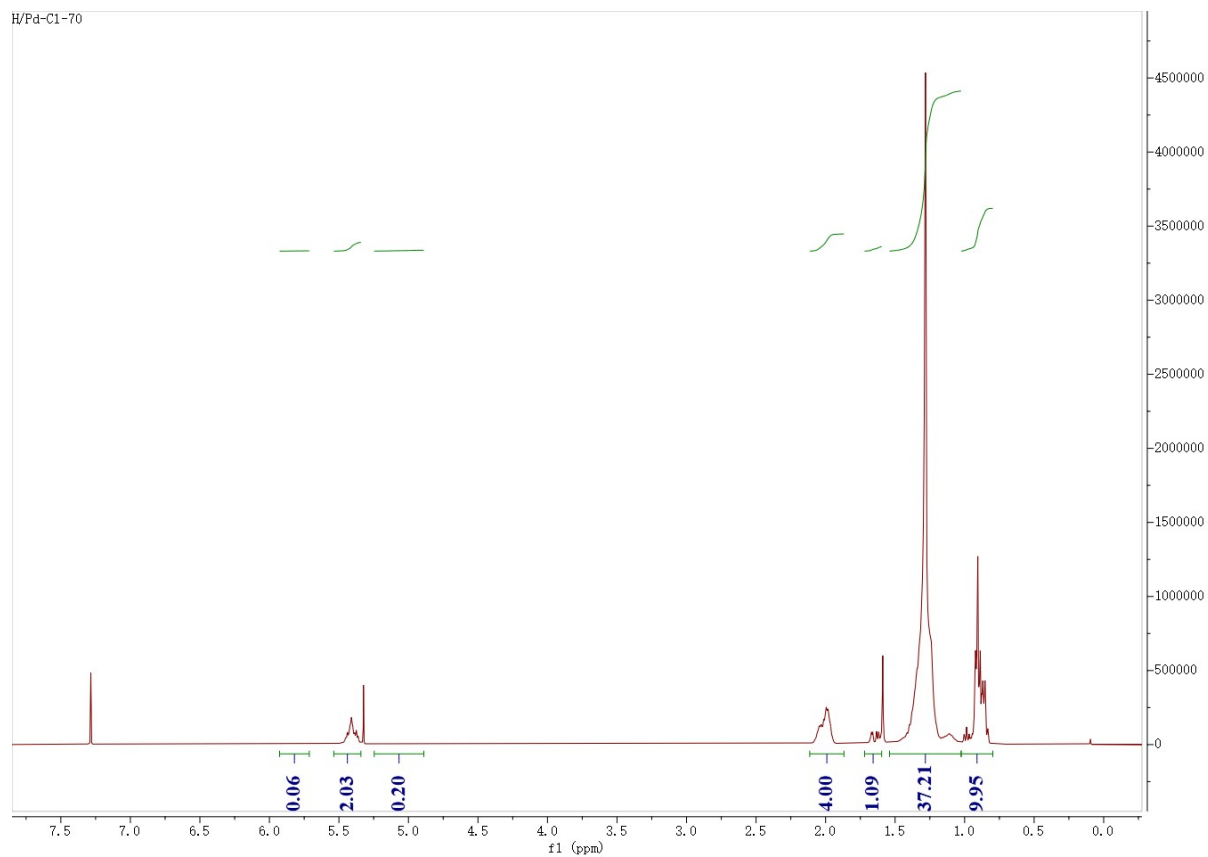

**Figure S19.**  $^1\text{H}$  NMR spectrum of the HBE0 from entry 9, table 1 ( $\text{CDCl}_3$ , 20  $^\circ\text{C}$ ).

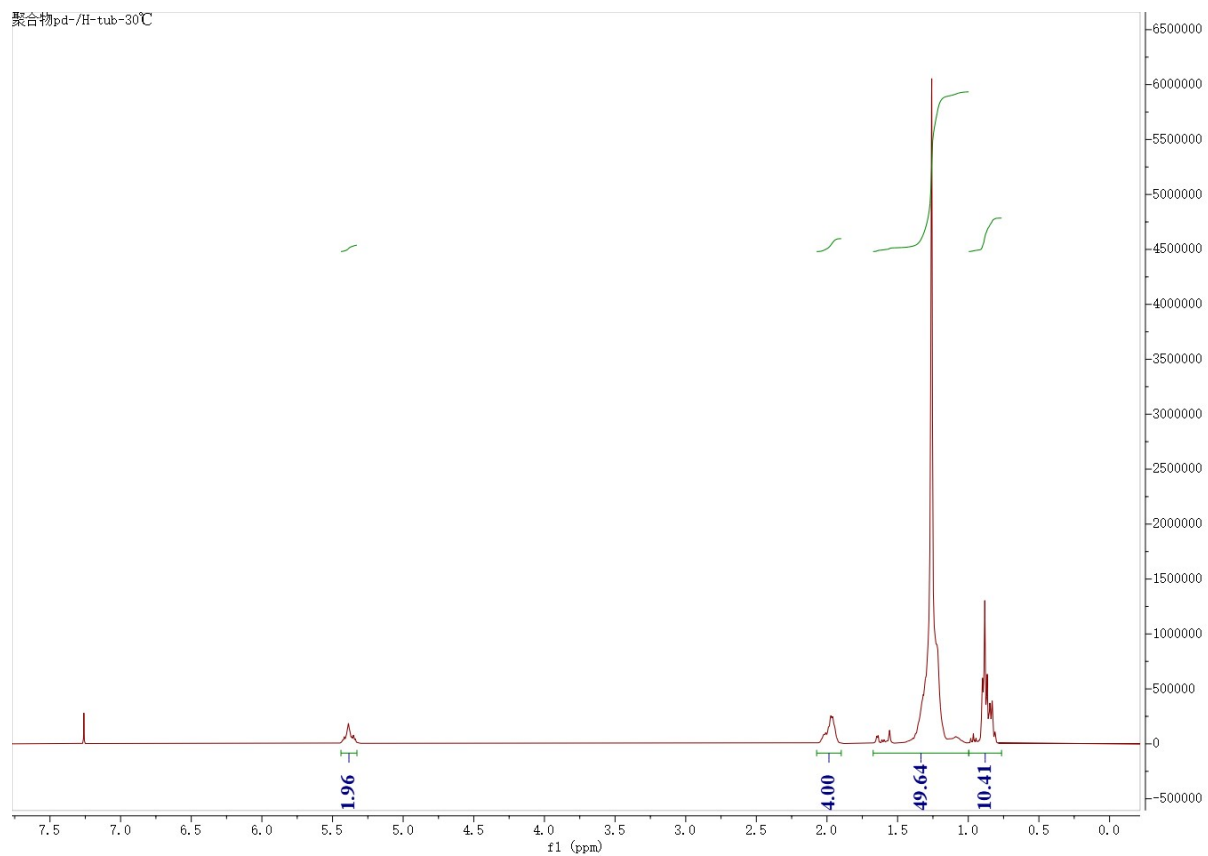

**Figure S20.**  $^1\text{H}$  NMR spectrum of the HBE0 from entry 10, table 1 ( $\text{CDCl}_3$ , 20  $^\circ\text{C}$ ).

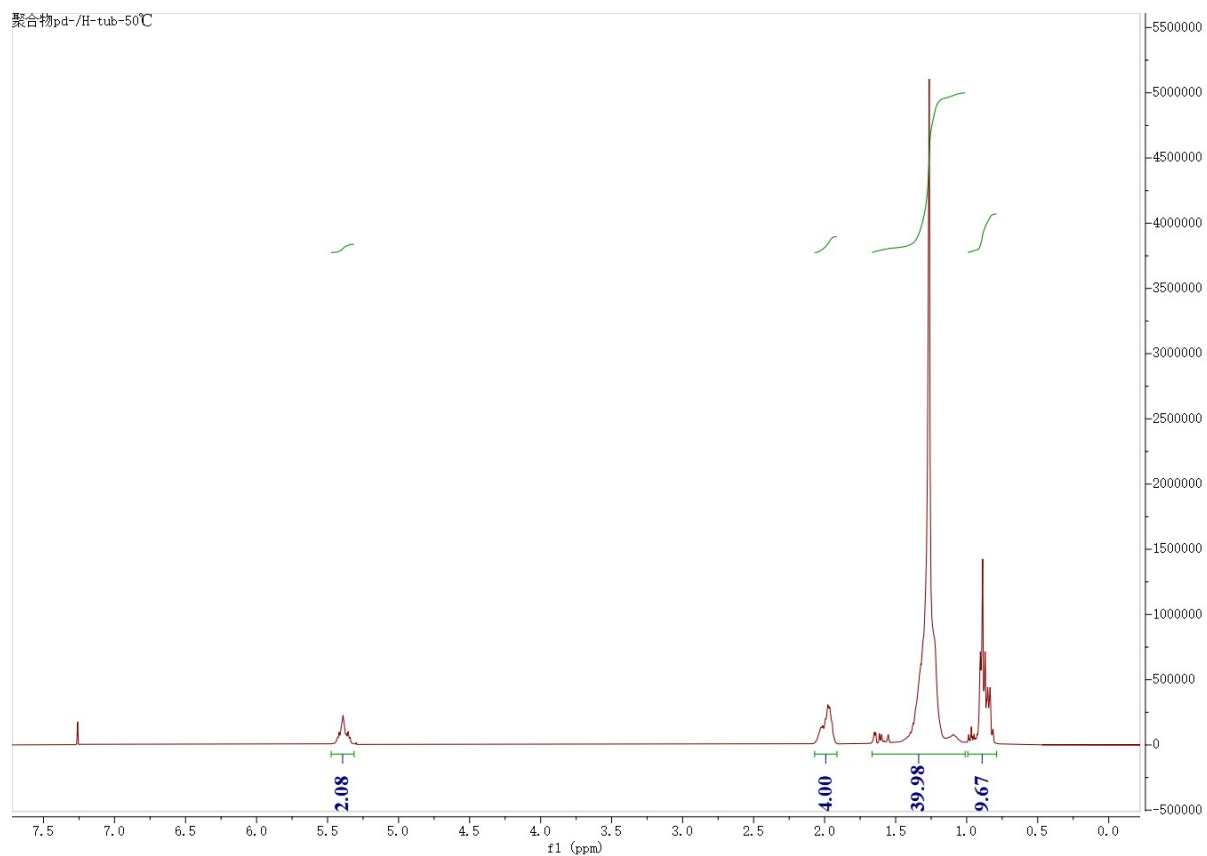

**Figure S21.**  $^1\text{H}$  NMR spectrum of the HBE0 from entry 11, table 1 ( $\text{CDCl}_3$ , 20  $^\circ\text{C}$ ).

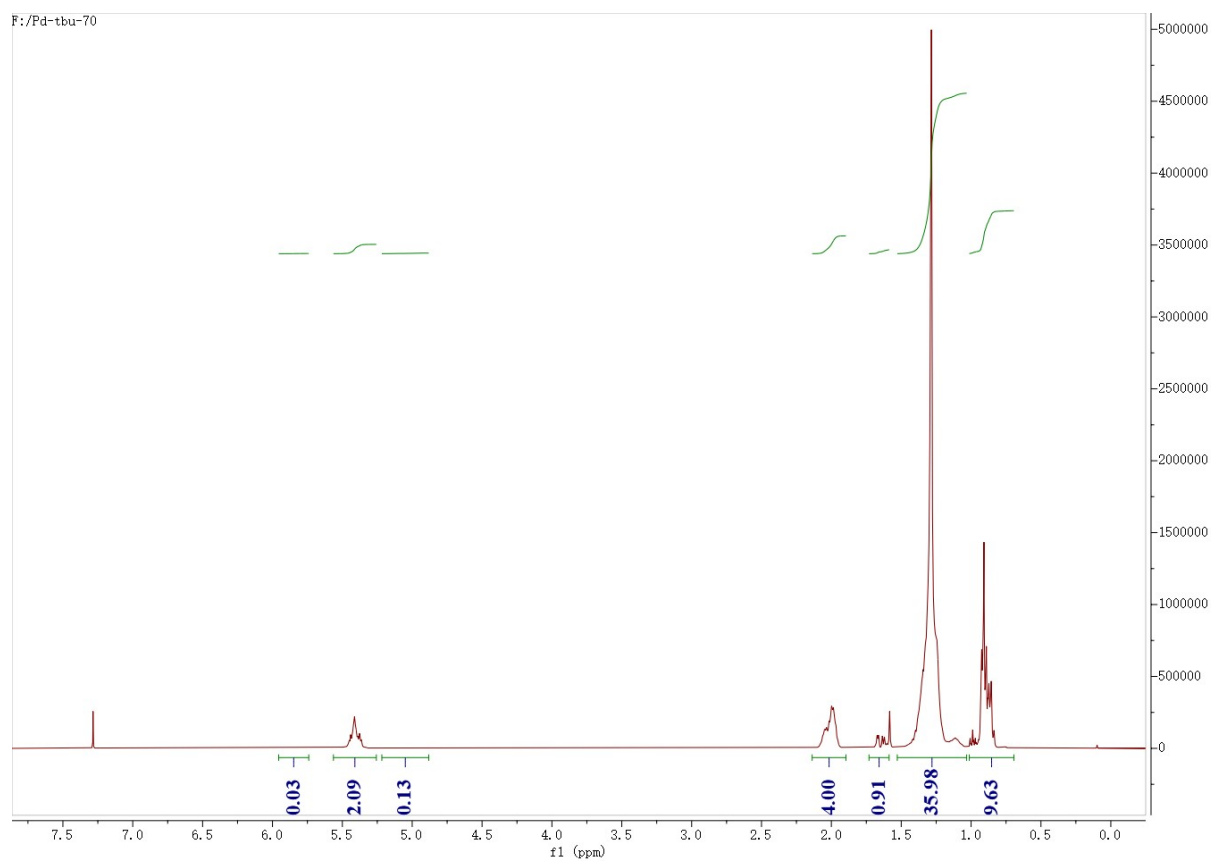

**Figure S22.**  $^1\text{H}$  NMR spectrum of the HBE0 from entry 12, table 1 ( $\text{CDCl}_3$ , 20  $^\circ\text{C}$ ).

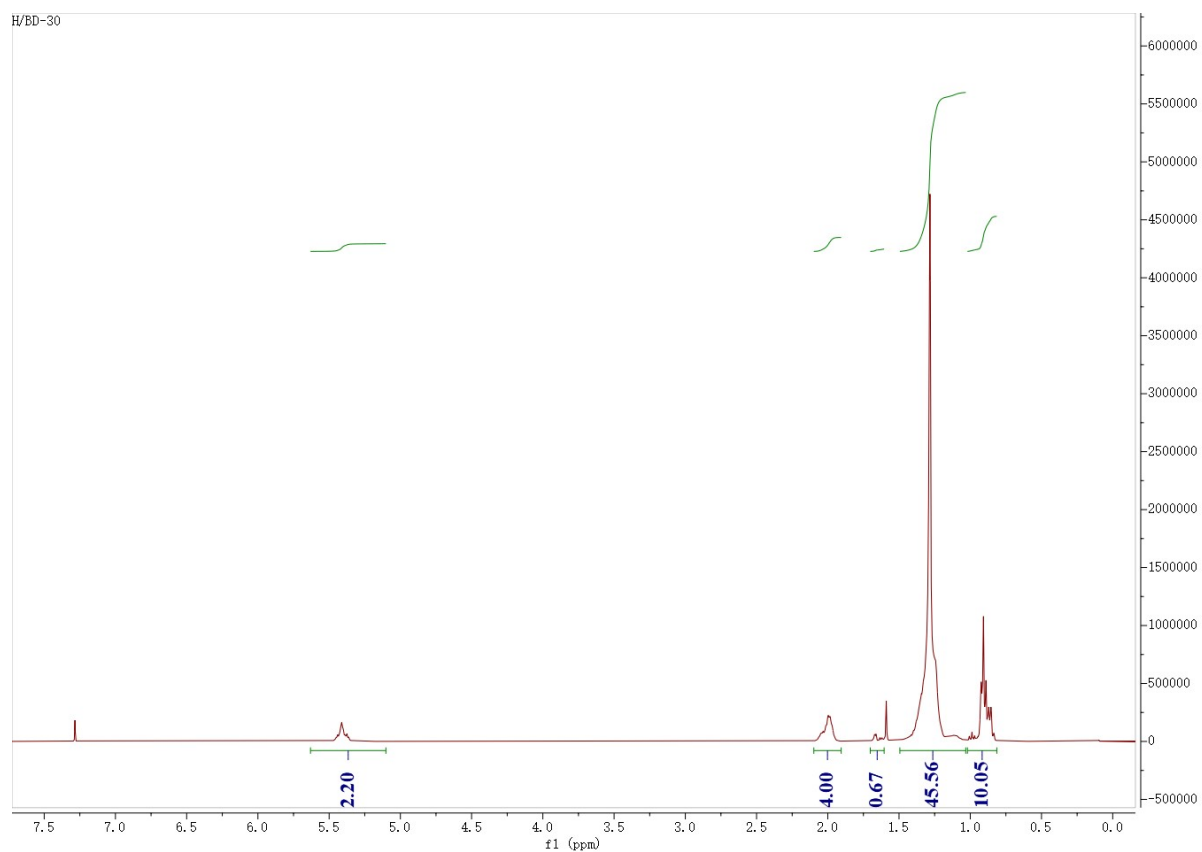

**Figure S23.**  $^1\text{H}$  NMR spectrum of the HBEO from entry 13, table 1 ( $\text{CDCl}_3$ ,  $20^\circ\text{C}$ ).

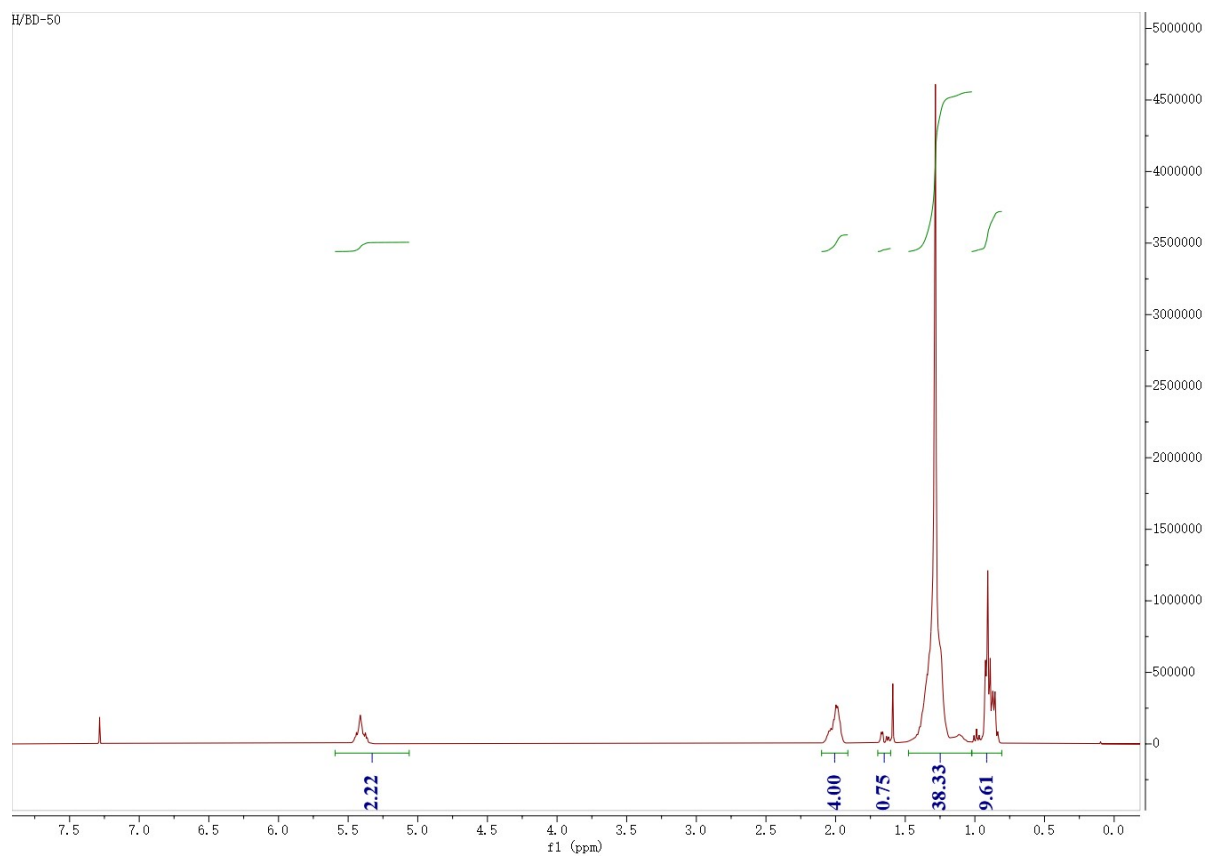

**Figure S24.**  $^1\text{H}$  NMR spectrum of the HBEO from entry 14, table 1 ( $\text{CDCl}_3$ ,  $20^\circ\text{C}$ ).

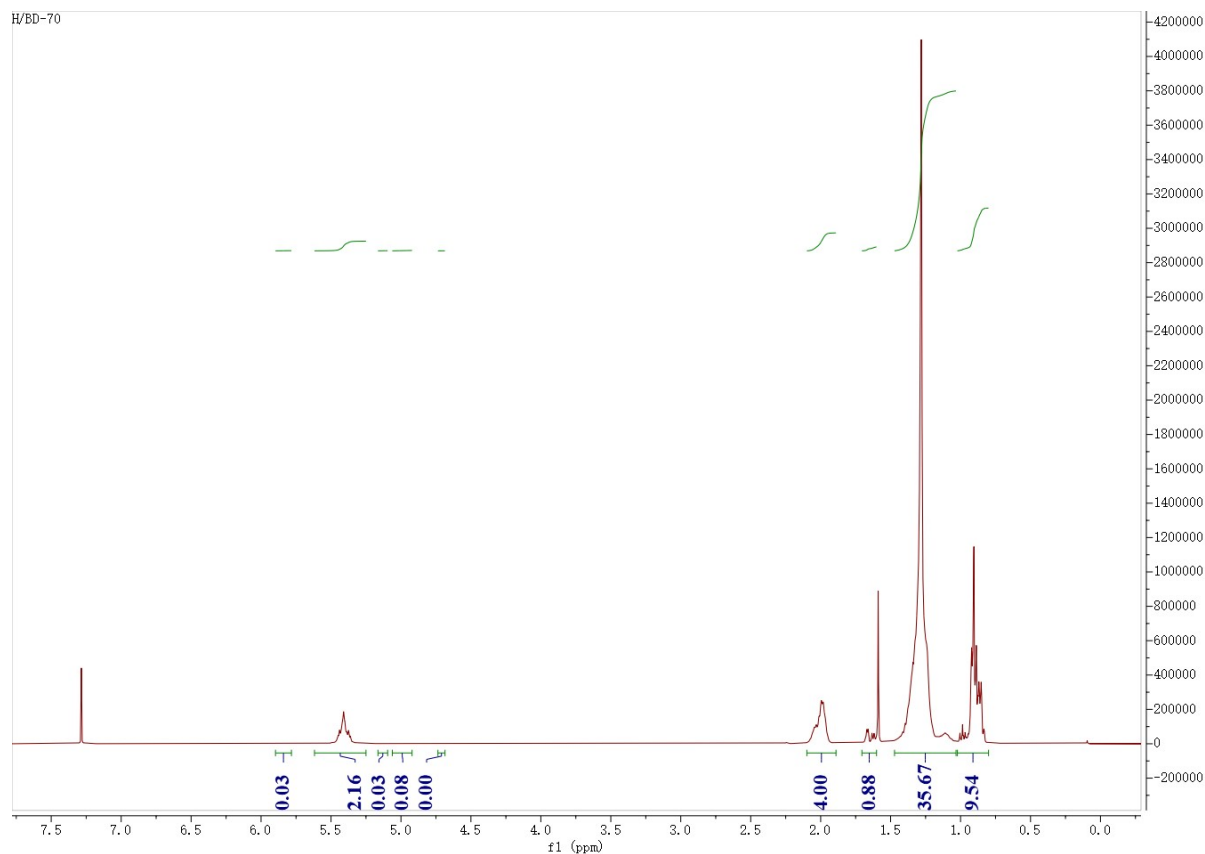

**Figure S25.**  $^1\text{H}$  NMR spectrum of the HBEO from entry 15, table 1 ( $\text{CDCl}_3$ , 20  $^\circ\text{C}$ ).

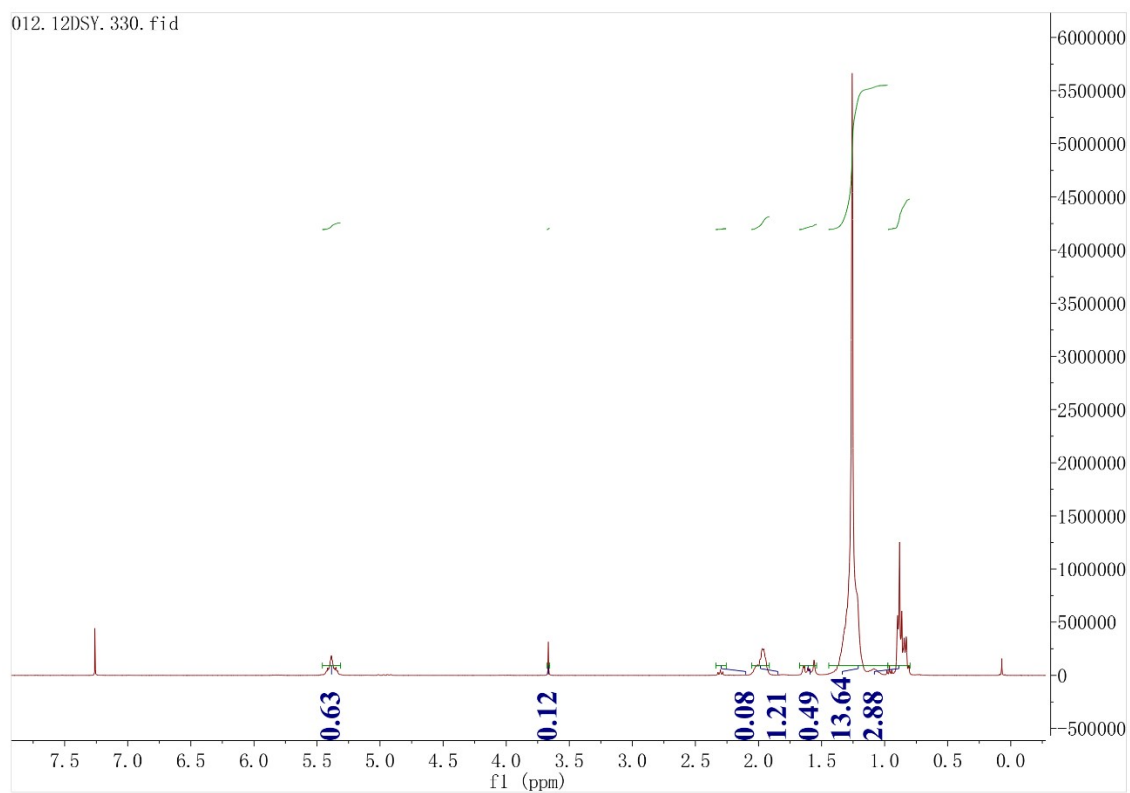

**Figure S26.**  $^1\text{H}$  NMR spectrum of the polymer from entry 1, table 2 ( $\text{CDCl}_3$ , 20  $^\circ\text{C}$ ).

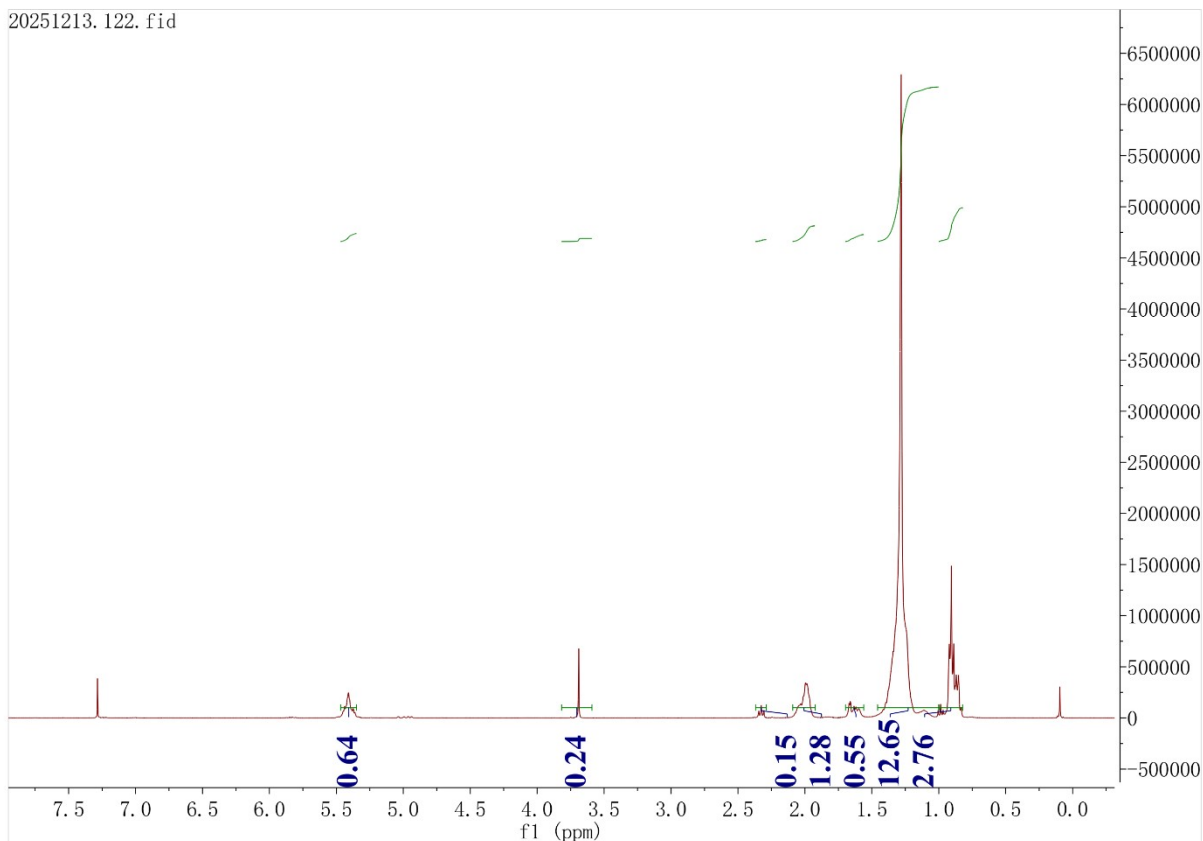

**Figure S27.**  $^1\text{H}$  NMR spectrum of the polymer from entry 2, table 2 ( $\text{CDCl}_3$ , 20  $^\circ\text{C}$ ).

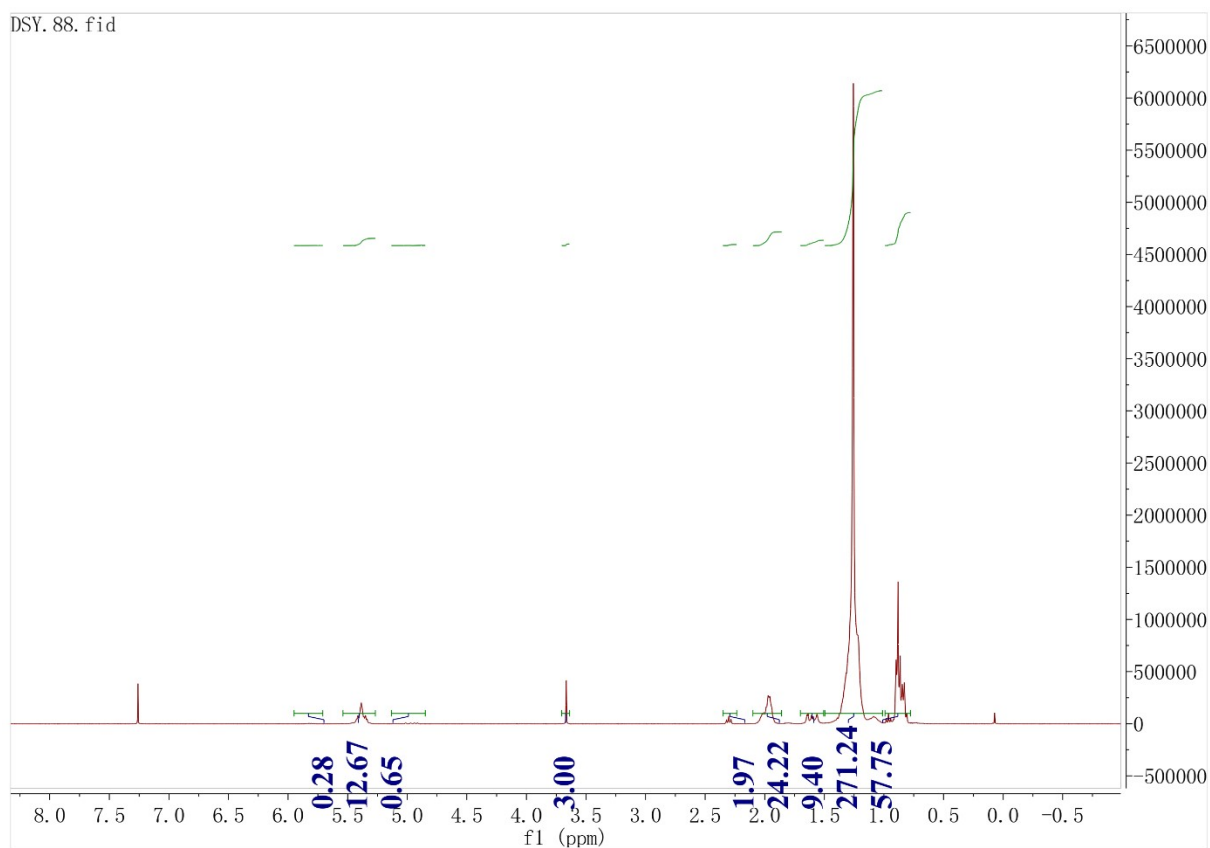

**Figure S28.**  $^1\text{H}$  NMR spectrum of the polymer from entry 3, table 2 ( $\text{CDCl}_3$ , 20  $^\circ\text{C}$ ).

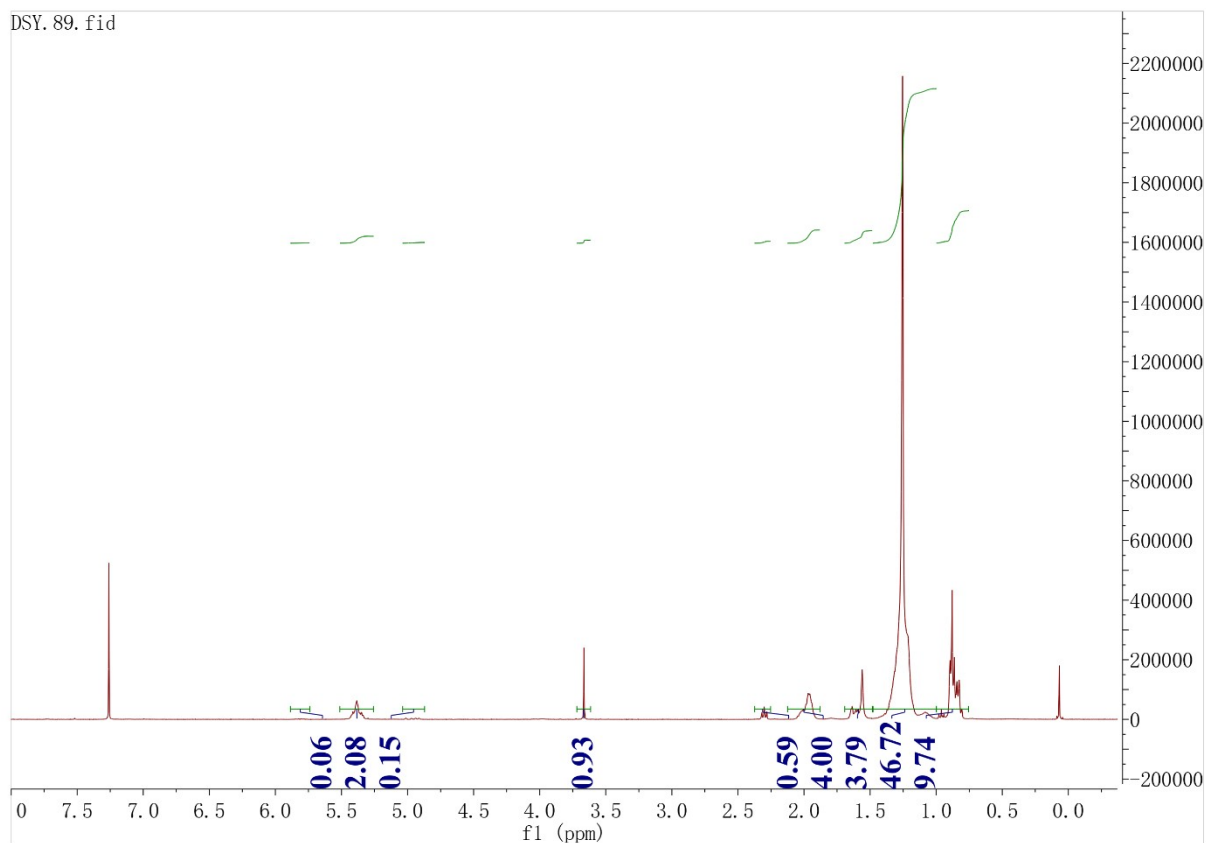

**Figure S29.**  $^1\text{H}$  NMR spectrum of the polymer from entry 4, table 2 ( $\text{CDCl}_3$ , 20  $^\circ\text{C}$ ).

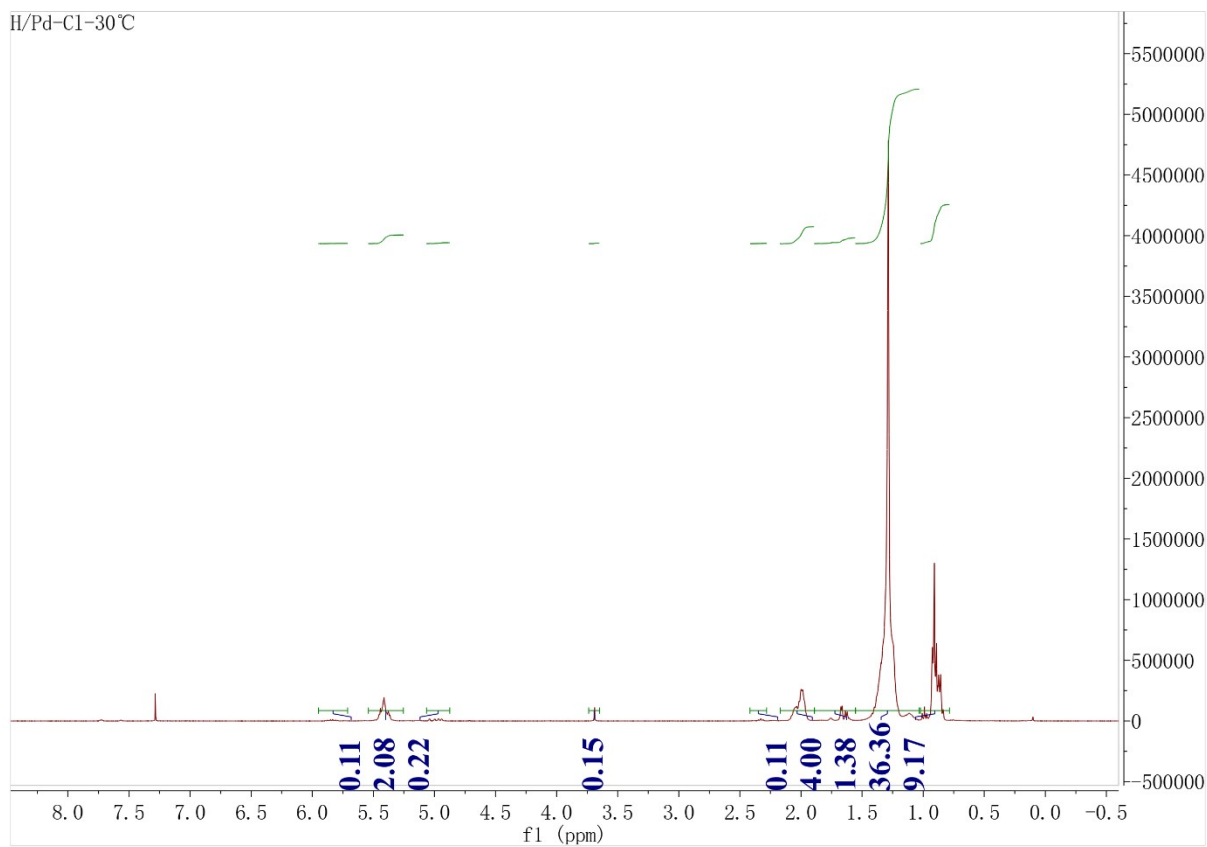

**Figure S30.**  $^1\text{H}$  NMR spectrum of the polymer from entry 5, table 2 ( $\text{CDCl}_3$ , 20  $^\circ\text{C}$ ).

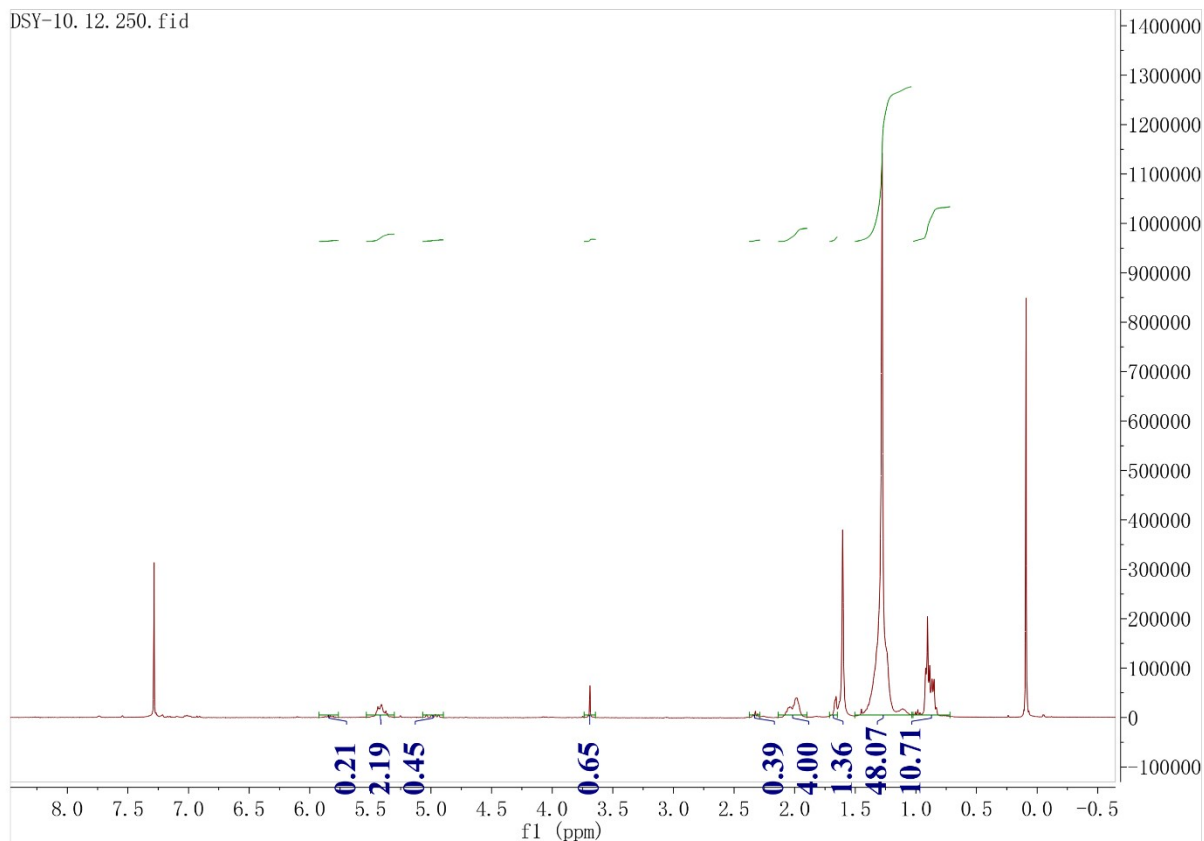

**Figure S31.**  $^1\text{H}$  NMR spectrum of the polymer from entry 6, table 2 ( $\text{CDCl}_3$ , 20  $^\circ\text{C}$ ).

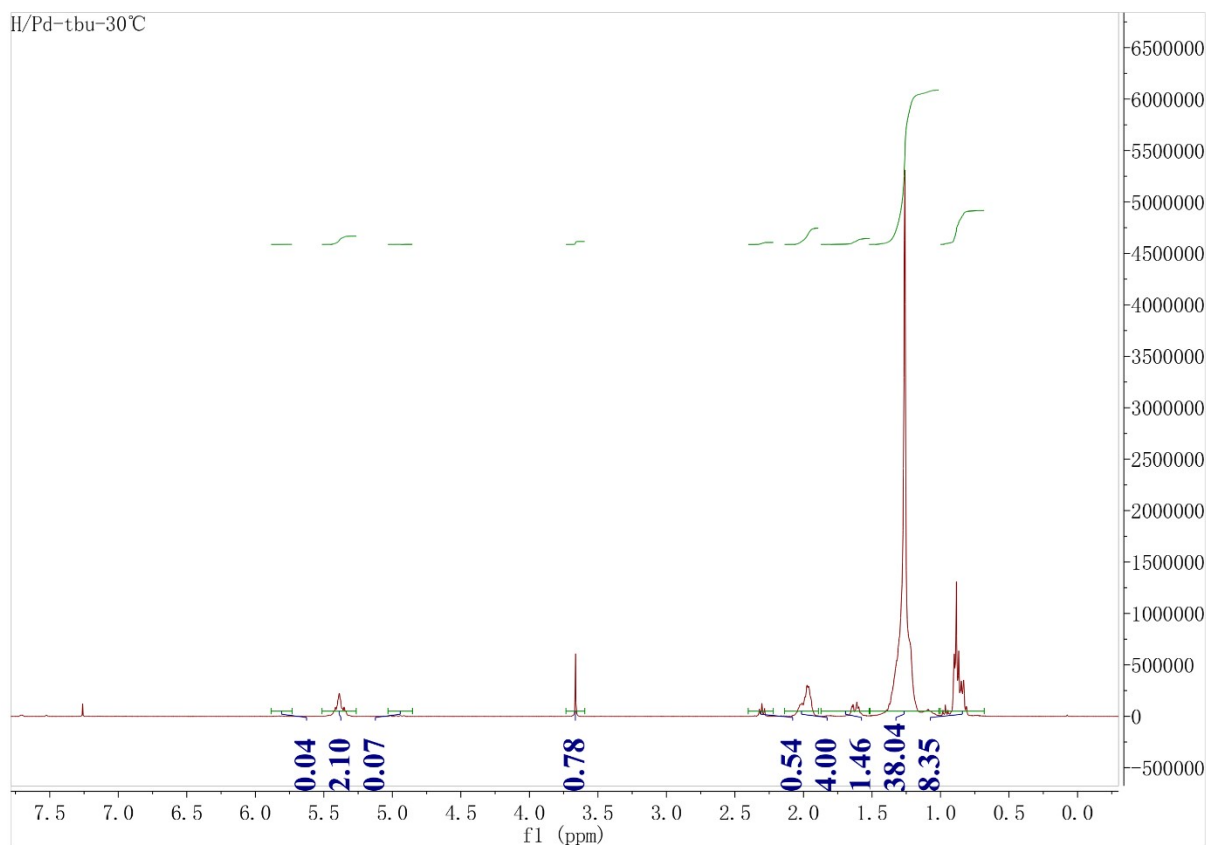

**Figure S32.**  $^1\text{H}$  NMR spectrum of the polymer from entry 7, table 2 ( $\text{CDCl}_3$ , 20  $^\circ\text{C}$ ).

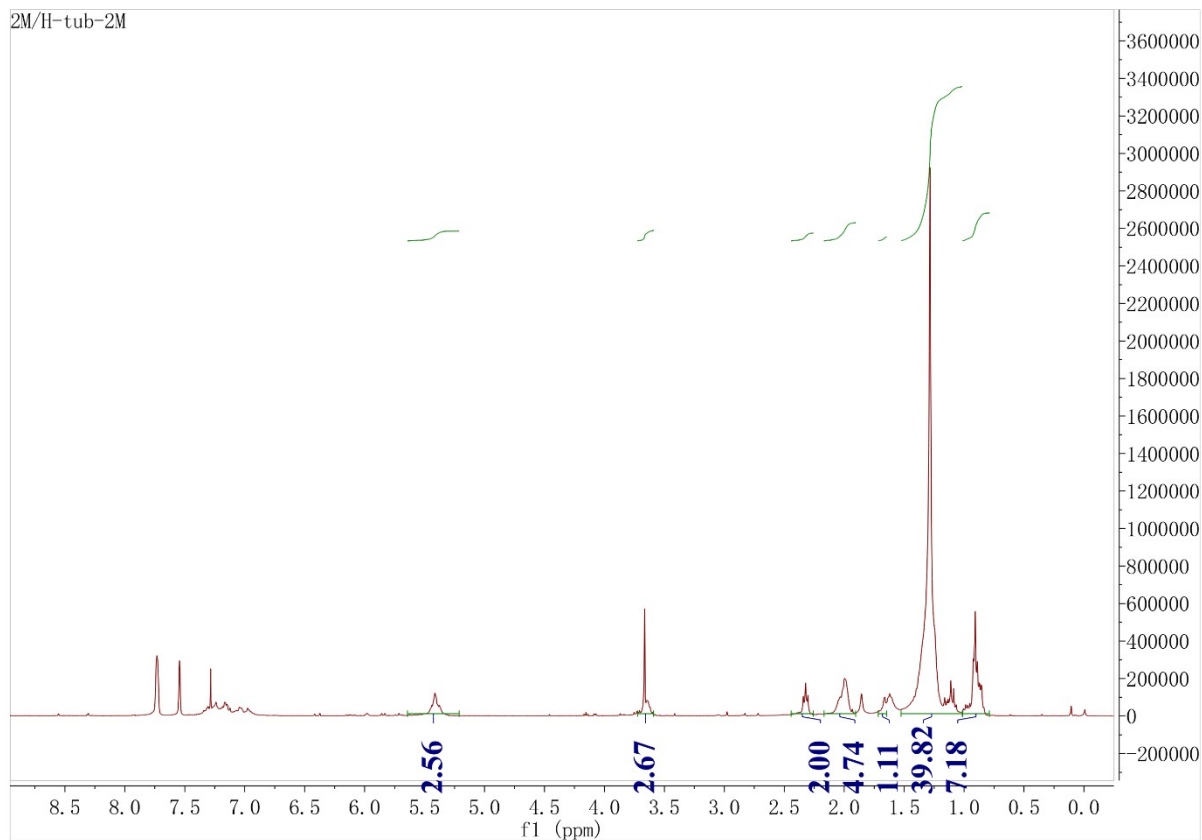

**Figure S33.**  $^1\text{H}$  NMR spectrum of the polymer from entry 8, table 2 ( $\text{CDCl}_3$ , 20  $^\circ\text{C}$ ).

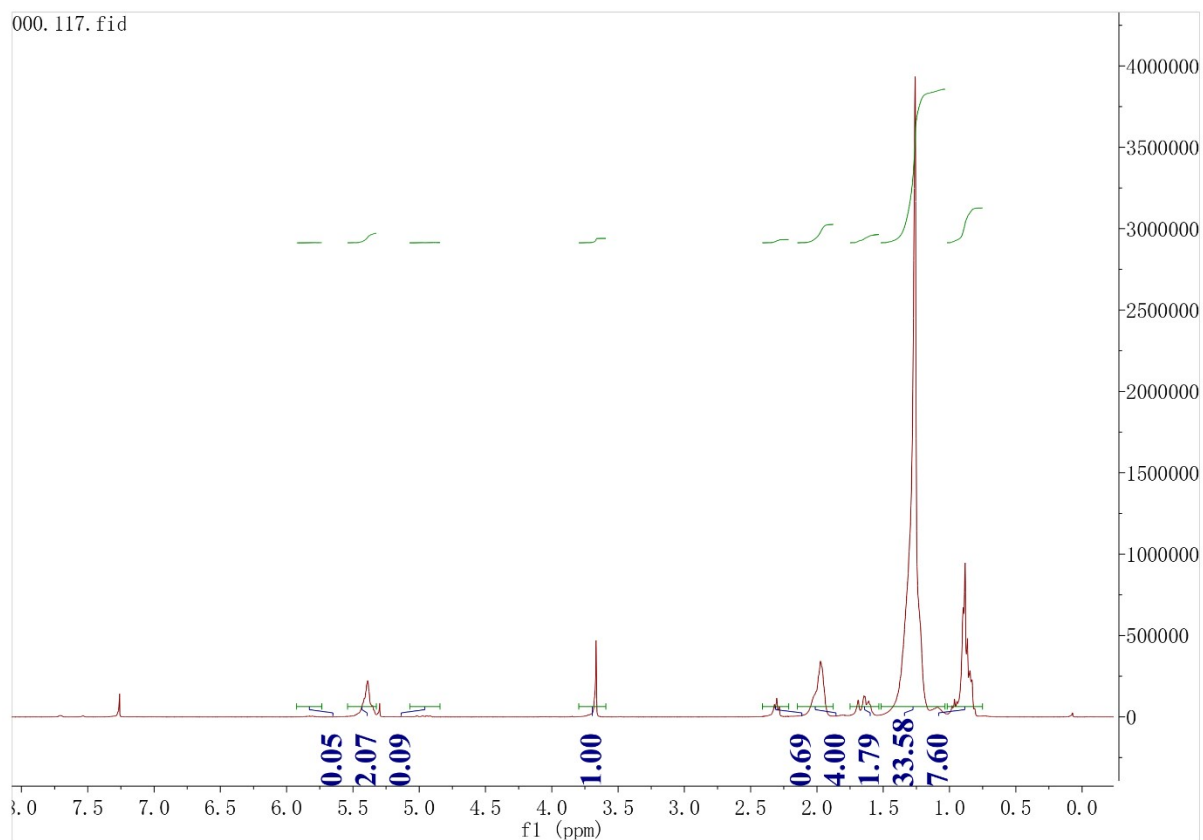

**Figure S34.**  $^1\text{H}$  NMR spectrum of the polymer from entry 9, table 2 ( $\text{CDCl}_3$ , 20  $^\circ\text{C}$ ).

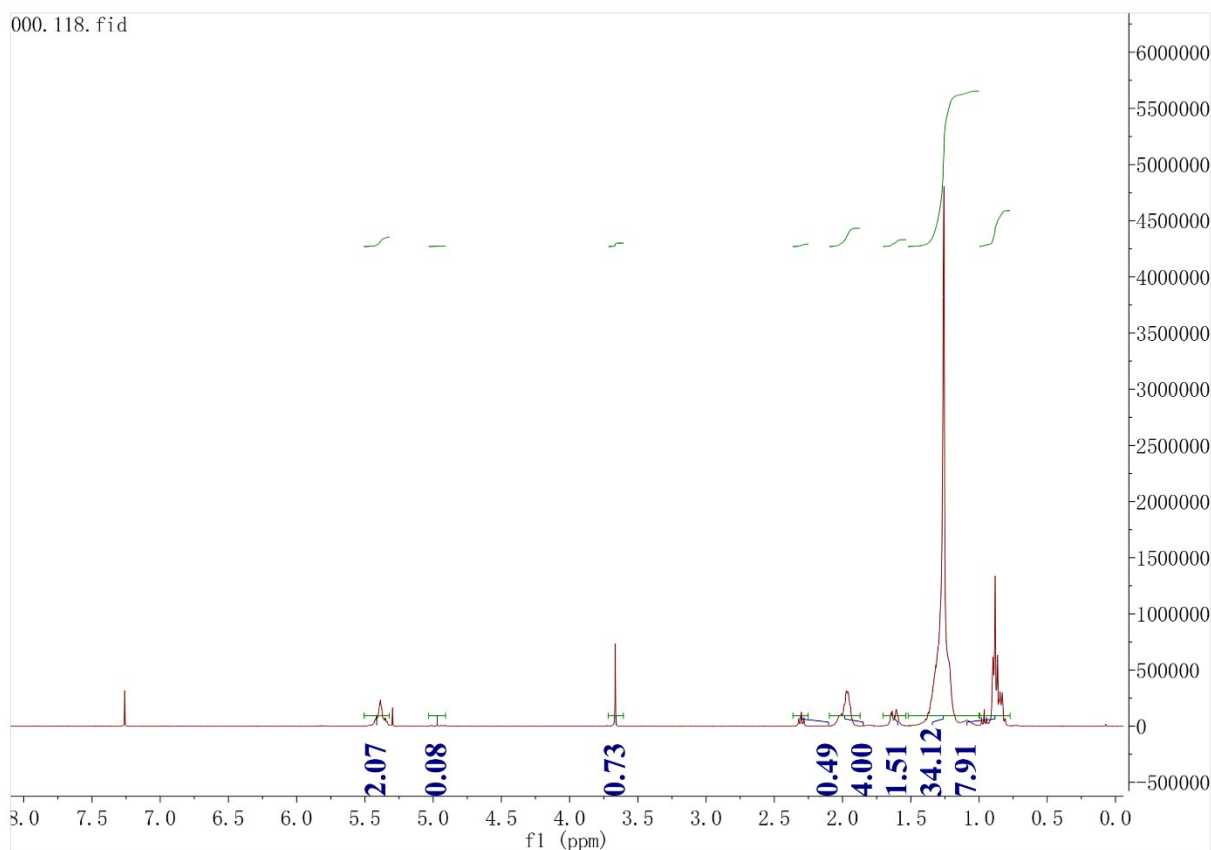

**Figure S35.**  $^1\text{H}$  NMR spectrum of the polymer from entry 10, table 2 ( $\text{CDCl}_3$ , 20 °C).

### 2.3 Rheological Properties of the Representative HBEO.

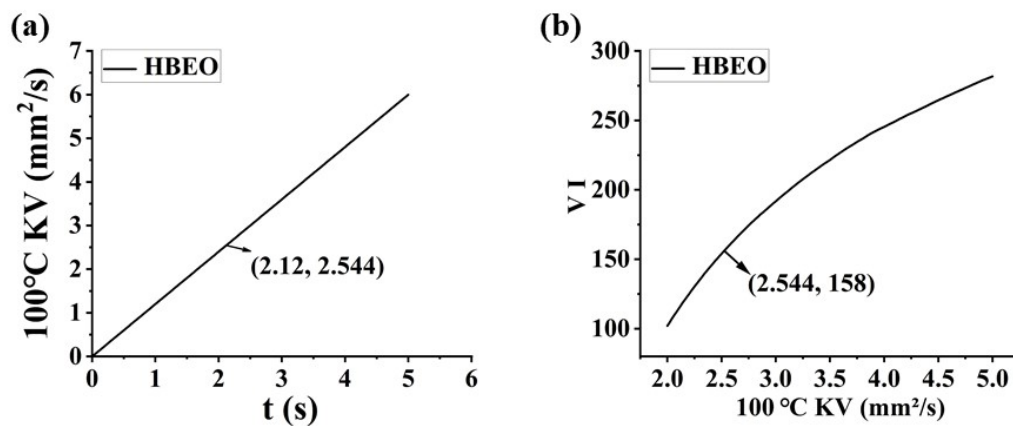

**Figure S36.** Rheological properties of the representative HBEO prepared by **Pd2** at 30 °C: kinematic viscosity (100 °C) and viscosity index.
